# Supplementary material
Source: PubMed Central journal article supplement (PMC8821969)
Supplement: mmc6.pdf [file mmc6.pdf]

# Improved post-stroke spontaneous recovery by astrocytic extracellular vesicles

Yessica Heras-Romero,<sup>1</sup> Axayacatl Morales-Guadarrama,<sup>2,3</sup> Ricardo Santana-Martínez,<sup>1</sup> Isaac Ponce,<sup>1</sup> Ruth Rincón-Heredia,<sup>4</sup> Augusto César Poot-Hernández,<sup>5</sup> Araceli Martínez-Moreno,<sup>6</sup> Esteban Urrieta,<sup>6</sup> Berenice N. Bernal-Vicente,<sup>1</sup> Aura N. Campero-Romero,<sup>1</sup> Perla Moreno-Castilla,<sup>7</sup> Nigel H. Greig,<sup>8</sup> Martha L. Escobar,<sup>6</sup> Luis Concha,<sup>9</sup> and Luis B. Tovar-y-Romo<sup>1</sup>

<sup>1</sup>Department of Molecular Neuropathology, Instituto de Fisiología Celular, Universidad Nacional Autónoma de México, Mexico City, Mexico; <sup>2</sup>Departamento de Ingeniería Eléctrica, Universidad Autónoma Metropolitana Iztapalapa, Mexico City, Mexico; <sup>3</sup>National Center for Medical Imaging and Instrumentation Research, Mexico City, Mexico; <sup>4</sup>Microscopy Core Unit, Instituto de Fisiología Celular, Universidad Nacional Autónoma de México, Mexico City, Mexico; <sup>5</sup>Bioinformatics Core Unit, Instituto de Fisiología Celular, Universidad Nacional Autónoma de México, Mexico City, Mexico; <sup>6</sup>División de Investigación y Estudios de Posgrado, Facultad de Psicología, Universidad Nacional Autónoma de México, Mexico City, Mexico; <sup>7</sup>Laboratory of Neurocognitive Aging, National Institute on Aging, National Institutes of Health, Baltimore, MD, USA; <sup>8</sup>Drug Design & Development Section, National Institute on Aging, National Institutes of Health, Baltimore, MD, USA; <sup>9</sup>Department of Behavioral and Cognitive Neurobiology, Instituto de Neurobiología, Universidad Nacional Autónoma de México, Juriquilla, Querétaro, Mexico

**Spontaneous recovery after a stroke accounts for a significant part of the neurological recovery in patients. However limited, the spontaneous recovery is mechanistically driven by axonal restorative processes for which several molecular cues have been previously described. We report the acceleration of spontaneous recovery in a preclinical model of ischemia/reperfusion in rats via a single intracerebroventricular administration of extracellular vesicles released from primary cortical astrocytes. We used magnetic resonance imaging and confocal and multiphoton microscopy to correlate the structural remodeling of the corpus callosum and striatocortical circuits with neurological performance during 21 days. We also evaluated the functionality of the corpus callosum by repetitive recordings of compound action potentials to show that the recovery facilitated by astrocytic extracellular vesicles was both anatomical and functional. Our data provide compelling evidence that astrocytes can hasten the basal recovery that naturally occurs post-stroke through the release of cellular mediators contained in extracellular vesicles.**

## INTRODUCTION

The epidemiology of stroke has dynamically changed over recent decades. A constant improvement in clinical care and increased preventive measures, acute treatment, and timely neurorehabilitation have reduced the fatality rate and transformed stroke into a prevailing cause of chronically disabling disease across the developed world<sup>1</sup> and several developing nations, particularly in Latin America.<sup>2,3</sup> Acute ischemic stroke impacts cognition, sensation, vision, language, and motor performance, with prominent signs of hemianopsia (loss of sight in half of the visual field), diplopia (double vision of the same object), speech deficits, paresis (muscular weakness), paresthesia (abnormal sensations of the skin), and other motor and sensory deficits.<sup>4</sup>

Despite impactful neurological impairment, most patients regain some of their lost neurological functions without intervention via a phenomenon of spontaneous recovery, which is determined exclusively by the passage of time.<sup>5</sup> Such spontaneous recovery occurs rapidly, at the level of impairment, and is driven by plasticity mechanisms initiated by the stroke.<sup>6</sup> Functional motor gains related to spontaneous recovery are considered to be due to increased connectivity of motor network areas that were initially disjointed by the ischemic attack.<sup>7</sup> However, the extent of recovery varies among patients, and the level of neurological regain is considered to be proportional to the initial deficit.<sup>8</sup> Rehabilitation during a narrow time window can enhance functional recovery, primarily through compensation. However, most clinical trials have failed to show differences in outcome endpoints between experimental and control interventions.<sup>9</sup>

Studies in animal models have attempted to elucidate a time-limited period of heightened plasticity after focal brain injury and the mechanisms behind spontaneous recovery.<sup>6,10</sup> Cumulative data indicate that axonal repair, neurogenesis, and inflammation resolution mechanistically intervene in this recovery.<sup>11,12</sup> Particularly, axonal remodeling is a principal mechanism in which surviving neurons in the peri-infarct cortex establish new connections within the motor, somatosensory, and premotor areas within the ipsilesional hemisphere, with some reaching contralesional sites,<sup>13,14</sup> while others even innervate the frontal motor regions to the brainstem or spinal cord.<sup>15</sup> However, these new projections alter the topography of cortical

Received 13 May 2021; accepted 20 September 2021;  
<https://doi.org/10.1016/j.ymthe.2021.09.023>.

**Correspondence:** Luis B. Tovar-y-Romo, PhD, Department of Molecular Neuropathology, Instituto de Fisiología Celular, Universidad Nacional Autónoma de México, 04510 Mexico City, Mexico.

**E-mail:** [ltovar@ifc.unam.mx](mailto:ltovar@ifc.unam.mx)

projections in the somatosensory system and change the aggregate map of projections.<sup>16,17</sup>

Astrocytes and astrocytic gliosis are known to impede the recovery of injured tissue by blocking axonal sprouting through the production of structural astrocytic proteins such as glial fibrillary acidic protein (GFAP) and vimentin,<sup>18</sup> as well as neurite-inhibiting signaling molecules such as Nogo-A.<sup>19</sup> Nonetheless, astrocytes have multiple essential support functions whose loss can precipitate or contribute to neurodegeneration.<sup>20</sup> Astrocytes are more resilient against ischemia than neurons;<sup>21,22</sup> therefore, astrocyte survival holds the potential to restore neuronal integrity and promote a functional improvement, especially in the ischemic penumbra.<sup>23</sup>

In this study, we evaluated in a preclinical stroke model caused by the transient occlusion of the middle cerebral artery (MCAO) in rats whether astrocytes might influence spontaneous recovery through signaling mechanisms mediated by the release of extracellular vesicles (EVs), which are known to contribute to the modulation of CNS physiology and pathology.<sup>24</sup>

## RESULTS

### EV release from astrocytes after hypoxia

We isolated EVs released from primary astrocytes cultured under normoxic conditions to characterize their effects on stroke evolution. We also subjected astrocytes to a hypoxic challenge to assess whether EVs would retain their molecular activities in response to ischemia (Figure 1A). The 6-h hypoxic stimulus produces an ~30% reduction of cell viability (Figures 1B and 1C; Figure S1).

We ran a physical and molecular characterization of the EVs released from cultured primary cortical astrocytes obtained from P2 newborn rats. The isolation method used in this study, which involves differential centrifugation, produces a homogeneous EV population with a size consistent with exosomes, as analyzed by transmission electron microscopy (Figure 1C) and nanoparticle tracking analysis (Figures 1E and 1F). The isolated EVs also expressed the canonical exosomal marker CD63 (Figure 1D). When we subjected the astrocytic cultures to hypoxia for 6 h, the number of exosomes collected in 48 h-conditioned media was significantly lower than in the normoxic conditions (Figures 1E and 1F), so that a physiological outcome to ischemic stress would be reducing the release of EVs.

### Administration of astrocyte-derived EVs in the rat brain

In a pilot experiment, using a pulled glass microcapillary pipette, we administered stereotaxic injections of EVs collected from astrocyte-conditioned media resuspended in 0.1 mM PBS into the lateral ventricle of the rat brain. We evaluated EV boluses with total protein concentrations of 200 and 400 ng determined by a bicinchoninic acid protein assay in a volume of 4  $\mu$ L. The higher concentration (400 ng) yielded a larger difference in infarct volume respective to vehicle-injected controls and was therefore used for the rest of the study. On average, we injected approximately  $8.5 \times 10^7$  vesicles in each administration. Subsequently, we explored the distribution of EVs

in the rat brain. We noted that exogenous EVs reached the striatum (Figure 1G) and motor cortex (Figure 1H) within 2 h (Figure S2) and remained identifiable 24 h post-injection. Furthermore, we found that EVs became internalized in neurons and astrocytes (Figure 1I; Figure S2; Video S1) and were preferentially localized in the perinuclear region. Using these experimental parameters, we studied the effects of EVs produced by astrocytes cultured under normoxic conditions for 48 h (NxEV) and those released by astrocytes during the same period after culturing under hypoxic conditions for 6 h (HxEV) to determine whether hypoxia modifies the neuroprotective potential of astrocyte EVs.

### Spontaneous recovery in the preclinical model of stroke

We began by determining the temporal evolution of infarct assessed with magnetic resonance imaging (MRI). Figure 2B shows coronal slices from a T2-weighted MRI sequence of stroke-challenged animals at 24 h with NxEV or HxEV administration compared to control animals injected with vehicle alone. Evident at 24 h, there was a significant reduction in the average infarct volume in animals that received either type of EVs compared to the control group ( $p = 0.0157$  for NxEV and  $p = 0.0163$  for HxEV by two-way ANOVA with Tukey's post hoc test, Figures 2B and 2D). At this time, there was no difference between NxEV and HxEV ( $p = 0.9997$ ), but a difference became apparent over time. Specifically, by day 21 after stroke,  $p$  values were 0.0144 for NxEV and  $<0.0001$  for HxEV compared to the control and 0.002 between NxEV and HxEV (Figures 2C and 2D), demonstrating that a single injection of EVs at the beginning of the reperfusion phase contributed to the gradual reduction of the infarct volume. These observations correlated with the natural occurrence of spontaneous recovery in the rat after MCAO. We assessed the neurological performance of subjects on a series of tests that assess the integrity of sensory, motor, and sensorimotor circuits (Table 1). Control stroke-challenged rats that received vehicle alone demonstrated a significant recovery ( $p = 0.0374$ ,  $t = 3.576$ , degrees of freedom [df] = 3 in paired  $t$  test) during 21 days in the neurological parameters examined, as compared to the values obtained by each rat at 24 h after stroke (Figures 2E and 2F; Figure S3). Neurological recovery was enhanced in the groups that received EVs (NxEV,  $p = 0.0046$ ,  $t = 7.667$ ,  $df = 3$ ; HxEV,  $p = 0.0032$ ,  $t = 8.66$ ,  $df = 3$ ; Figures 2E and 2F; Figure S3). Video S2 shows an improved response to the stimulation of the vibrissae in a rat that received HxEV 14 days post-stroke.

### Hastened recovery of structural alterations by the administration of astrocyte-derived EVs

Using MRI, we studied the impact of EVs from cultured astrocytes on the evolution of the brain's physical recovery from stroke in a longitudinal study. We measured mean diffusivity (MD), which is a quantitative measure that reflects cellular and membrane density, wherein an increase of mean diffusivity results from edema and necrosis. The basal values of mean diffusivity ranged around  $6 \times 10^{-4}$   $\text{mm}^2/\text{ms}$  in the corpus callosum,  $3 \times 10^{-4}$   $\text{mm}^2/\text{ms}$  in the striatum, and  $4 \times 10^{-4}$   $\text{mm}^2/\text{ms}$  in the cortex. The values almost doubled in stroke-challenged rats at 24 h after the infarction,

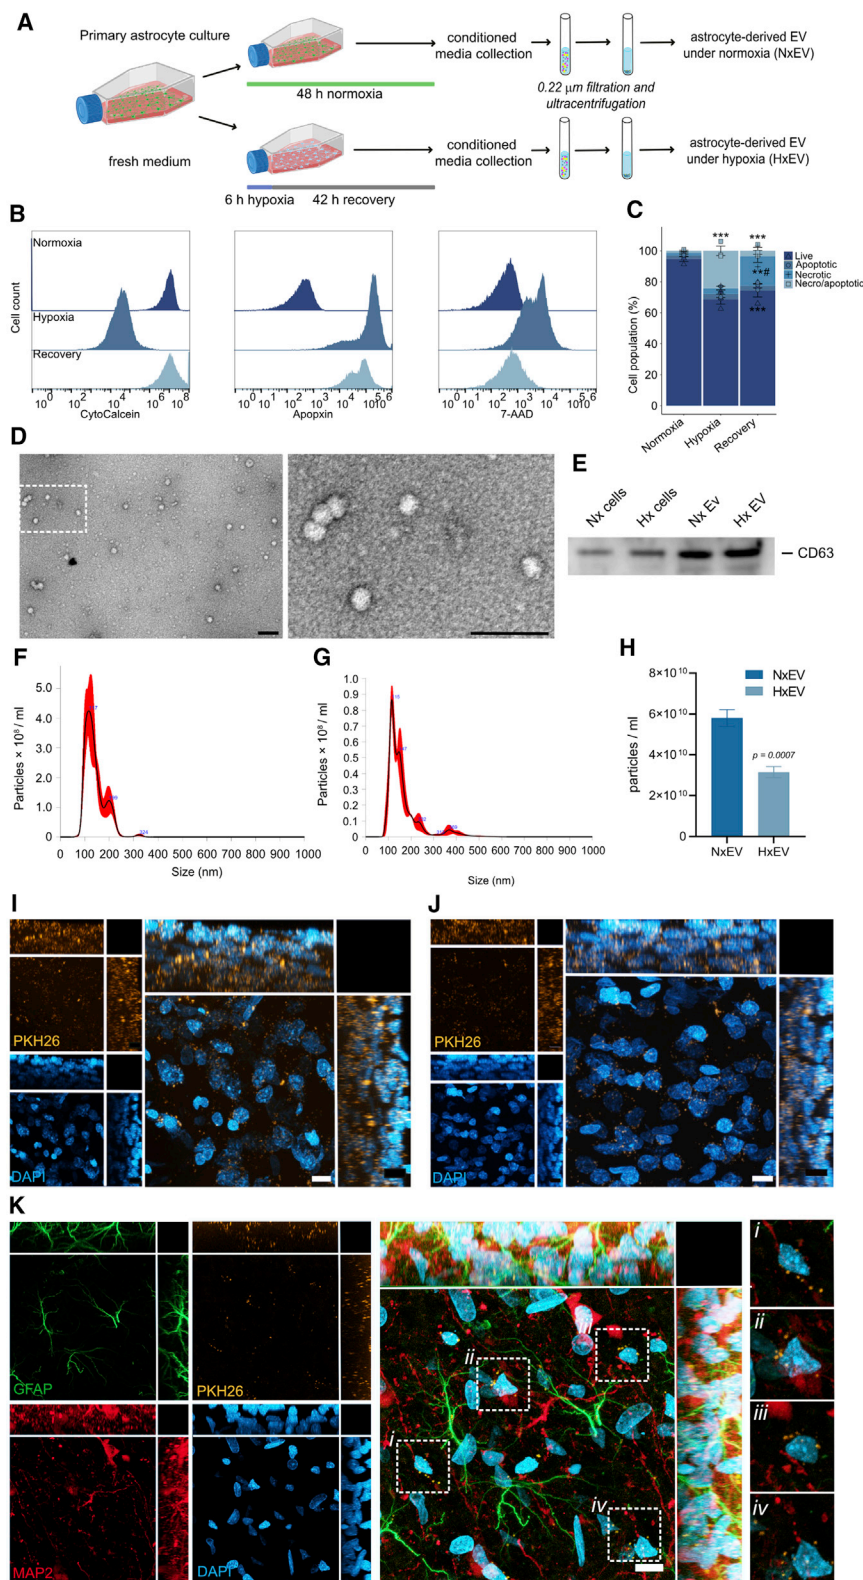

**Figure 1. Characterization of exosomes produced by astrocytes**

(A) Experimental design for collection of EVs. (B) Distribution of fluorescence intensity of markers for live (CytoCalcein), apoptotic (Apoptxin), and necrotic (7-AAD) cells under normoxia, hypoxia, and recovery. (C) Distribution of live and dead (apoptotic, necrotic, and necrotic/apoptotic) cells under each experimental condition. Graph shows the mean ± SEM of three independent experiments, # $p < 0.05$  versus hypoxia; \*\* $p < 0.005$ , \*\*\* $p < 0.0005$  versus normoxia. (D) Transmission electron microscopy micrographs of EVs isolated from astrocyte cultures for 24 h. Vesicles were visualized by negative staining with uranyl formate on copper/carbon-coated grids; scale bars, 100 nm. (E) Immunoblot showing the exosome canonical marker CD63 in protein lysates from EVs and astrocytes cultured under normoxia (Nx) and exposed to 6 h hypoxia and 42 h of recovery (Hx). (F and G) Size distribution of particles in suspensions by nanoparticle tracking analysis of EVs isolated under normoxia for 48 h (F) and after a 6-h hypoxic stimulus and 42-h recovery (G). (H) Graph shows the difference in the number of EVs released from astrocytes subjected to hypoxia (HxEV) and controls (NxEV) for 48 h. Data represent the mean ± standard deviation of three independent measurements. (I and J) Distribution of EVs stained with PKH26 (orange) injected i.c.v. into the brain of rats within the striatum (I) and motor cortex (J). (K) EVs internalized in neurons (MAP2; red) and astrocytes (GFAP; green) and preferentially localized to perinuclear (DAPI; blue) regions. Dotted squares demark regions where EVs localize; images on the left are magnifications of those regions. Images in (I), (J), and (K) are maximum projections of a z stack of 20 optical slices showing the orthogonal planes, and nuclei are stained with DAPI (blue); scale bars, 10 μm.

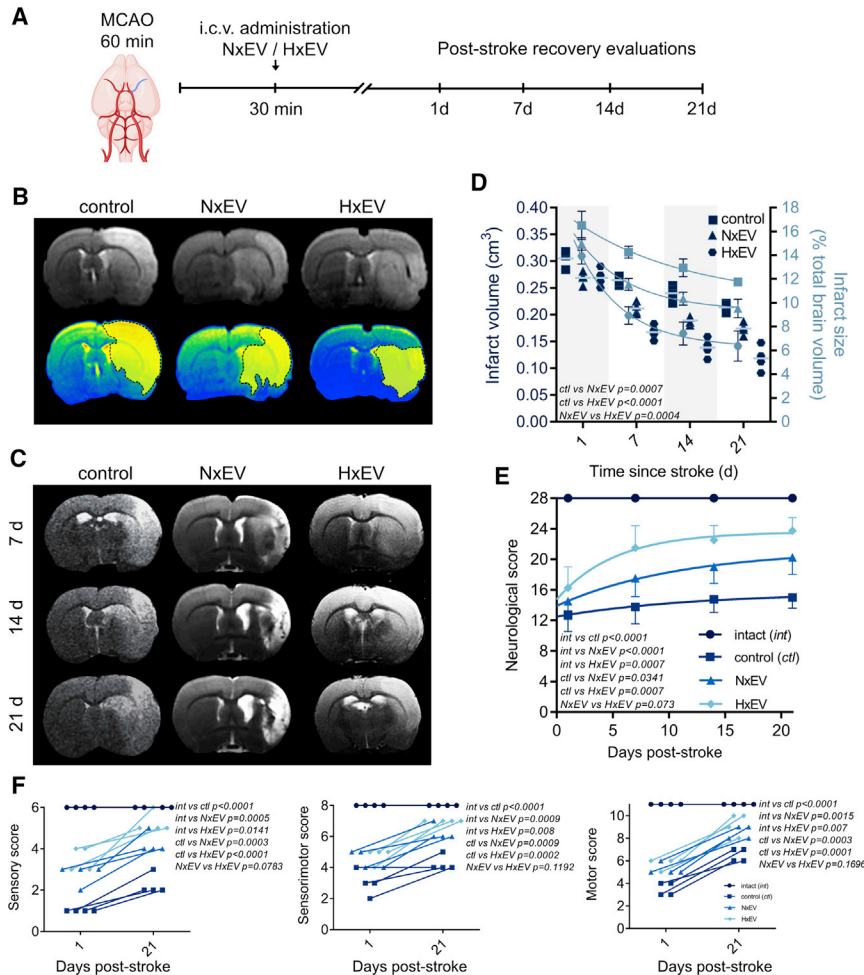

**Figure 2. i.c.v. administration of EVs shed by cultured astrocytes reduces the infarct volume in rats subjected to MCAO**

(A) Time frame of the experimental design. (B) Determination of infarct volume by magnetic resonance imaging (MRI) 24 h after MCAO in rats treated with vehicle (control) and EVs derived from astrocytes grown under normoxic (NxEV) and hypoxic (HxEV) conditions. The figure shows (top) the coronal section of T2-weighted sequences at AP  $-0.5$  from bregma, and (bottom) the infarcted area is shown in a yellow mask over a converted image that shows the regions of hyperdensity in a color scale. (C) Time course of MRI images of the different groups at 7, 14, and 21 days post-stroke. MRI shows the affected striatum and adjacent premotor, primary motor, and somatosensory cortices and reduced affected areas over time. (D) Quantification of the infarct volumes determined with whole-brain measurements and the percentage of brain volume affected by stroke. Data show the mean  $\pm$  SEM of  $n = 4$  animals per group. Two-way repeated-measures ANOVA followed by Tukey's post hoc test. (E) Evolution of neurological performance, and thus the motor and sensory recovery over 21 days of rats in the indicated experimental groups. Data points are the mean  $\pm$  SEM of four rats per group followed over time. Two-way repeated-measures ANOVA followed by Tukey's post hoc test. (F) The neurological evaluation was composed of tests that assessed performance in sensory and motor tasks and the integration of both. The figures show the initial (24 h) and last assessments (21 d) of each rat in each evaluation category.

irrespective of treatment (Figure 3A), across all brain structures analyzed. Notably, these values declined gradually and were decisively lower at 7 days post-stroke in the animals that received EVs. This was particularly evident in the group that received HxEV, which showed baseline mean diffusivity values by day 21. The corpus callosum and striatum exhibited the most robust recovery rates in this parameter, coincidentally with structures with a lower cellular density than in the cortex.

As noted above, the underlying processes of spontaneous recovery are firmly bound to axonal damage recovery. Axial diffusivity (AD) results from the structural integrity of axons, and a decrease of this value mirrors axonal damage. At 24 h post-stroke, we found that all animals displayed a significant reduction in axial diffusivity that was more severe in the striatum > cortex > corpus callosum, which corresponds to the hierarchical structural damage produced by MCAO (Figure 3B). Values in this parameter indicate a time-dependent recovery across all of the groups. However, such recovery was more robust in HxEV, followed by the NxEV group. By day 21 post-stroke, the axial diffusivities of HxEV in the striatum and cortex reached the baseline

values; the overall recovery trend of the HxEV group was significantly different from that of the control group ( $p = 0.0001$  for striatum and  $p < 0.0001$  for cortex), while the group with NxEV showed only significant differences in the cortex ( $p = 0.4259$  for striatum and  $p < 0.0001$  for cortex).

Radial diffusivity (RD) is another diffusion tensor imaging (DTI) parameter that evaluates axonal integrity, which is increased with demyelination and reduced axonal density. We found this value to be doubled in the corpus callosum, almost quadrupled in the striatum, and tripled in the cortex 24 h post-stroke (Figure 3C).

The last parameter we assessed with DTI is fractional anisotropy (FA), which is related to how freely water molecules move along axons and reflect their structural integrity. A reduction in FA levels indicates axonal damage. Due to the fibrous nature of the corpus callosum, the baseline values of FA in this structure are higher than those of the striatum and cortex. The FA baseline level in the corpus callosum (about 0.6) drastically dropped to a third in all experimental groups by 24 h post-stroke (Figure 3D). Notably, the administration of HxEV resulted in a substantial but slightly lesser effect than the untreated control group. Whereas FA in the control group slightly recovered by day 21 post-stroke, a very evident recovery occurred

**Table 1. Items evaluated in neurofunctional assessments**

| Neurological assessment                              | Reflex                                                          | Score |
|------------------------------------------------------|-----------------------------------------------------------------|-------|
| Spontaneous activity                                 | exploring an open arena for more than 20 s                      | 3     |
|                                                      | exploring between 10 and 20 s                                   | 2     |
|                                                      | exploring less than 10 s                                        | 1     |
|                                                      | not exploring or moving, only when stimulated                   | 0     |
| Body proprioception (S)                              | symmetric response when poked on each side                      | 3     |
|                                                      | no response in the thoracic lesioned hemibody                   | 2     |
|                                                      | no response in the lesioned hemibody                            | 1     |
|                                                      | no bilateral responses                                          | 0     |
| Vibrissae stimulation (S)                            | symmetric response                                              | 3     |
|                                                      | attenuated response on the lesioned side                        | 2     |
|                                                      | no response on the lesioned side                                | 1     |
| Cylinder test (SM)                                   | no response on any side                                         | 0     |
|                                                      | standing with both forelimbs at even height                     | 2     |
|                                                      | unable to support body weight on lesioned forelimb              | 1     |
|                                                      | Unresponsive                                                    | 0     |
| Protective retraction of forelimbs after poking (SM) | symmetrical flex and moving from the site                       | 3     |
|                                                      | asymmetrical flex of the ipsilateral forelimb but stays on-site | 2     |
|                                                      | slight movement of ipsilateral forelimb and stays on site       | 1     |
|                                                      | does not flex forelimb and stays on site                        | 0     |
| Body posture (SM)                                    | Balanced                                                        | 3     |
|                                                      | head tilted to the right and forearm extended                   | 2     |
|                                                      | body tilted to the right                                        | 1     |
|                                                      | unable to keep posture with lesioned hindlimb                   | 0     |
| March coordination (M)                               | symmetrical movement                                            | 3     |
|                                                      | support on the ulnar side of the lesioned forelimb              | 2     |
|                                                      | dragging fingers during the march                               | 1     |
|                                                      | does not stand on lesioned forelimb                             | 0     |
| Contra-lesioned-wise circling (M)                    | none                                                            | 3     |
|                                                      | spontaneous circling                                            | 2     |
|                                                      | stimulus-induced circling                                       | 1     |
| Prehensile grip of forepaws to a wire (M)            | not moving                                                      | 0     |
|                                                      | symmetrical grip                                                | 3     |
|                                                      | asymmetrical, unable to hold body weight                        | 2     |
|                                                      | unable to hold the grip with lesioned forelimb                  | 1     |
| Ability to rise while suspended from the tail (M)    | falling from wire                                               | 0     |
|                                                      | unskewed side to rise                                           | 2     |
|                                                      | able to rise only until reaching the horizontal plane           | 1     |
|                                                      | unresponsive while suspended                                    | 0     |

Every subject's neurological performance was assessed at 1, 7, 14, and 21 days after stroke in 10 items, and for each one, a corresponding value was assigned. S, somatosensory evaluation; M, motor evaluation; SM, evaluation of the integration of somatosensory/motor coordination. Behavioral evaluations were cross-validated by a trained analyst blinded to the experimental conditions.

with the administration of either NxEV or HxEV. The latter, in particular, demonstrated a more considerable effect and a clear time-dependent trend toward recovery (Figure 3D). The more severely affected striatum exhibited an even more substantial FA decrease 24 h after infarction, and NxEV did not impact the overall recovery trend.

In contrast, HxEV did promote a significant improvement that evolved rapidly at 7 days post-stroke and exhibited almost normal values by day 14. Finally, in the cortex, with a more heterogeneous architecture than the corpus callosum and the striatum, the stroke-induced changes were of lesser magnitude by day 7. HxEV almost fully mitigated them at this early time point (Figure 3D), whereas NxEV did not affect the spontaneous recovery.

Stroke notably impacts the brain as a whole, and structural damage appears not to be restricted to the only sites where blood supply was impeded. Our MRI study shows that the brain hemisphere contralateral to the lesion had structural changes that resolved over time, and the administration of EVs hastened the recovery. EVs induced a full recovery of the mean diffusivity in the corpus callosum by day 21 (Figure S4A). The contralateral cortex and striatum showed subtler changes that were normalized by 14 days with HxEV and 21 days with NxEV (Figure S4A). Similarly, the axial diffusivities of the corpus callosum and contralateral cortex were fully recovered by day 21 with the administration of EVs (Figure S4B). In the striatum, the trend toward full recovery was more marked with HxEV. As in the ipsilateral side, the radial diffusivity was minimally affected by the stroke in the contralateral hemisphere, and the administration of HxEV provided full recovery as early as day 7 post-stroke for the striatum and cortex (Figure S4C). Finally, the FA of the contralateral structures showed a similar recovery pattern as that of the ipsilateral hemisphere, with the striatum and cortex showing full recovery with the aid of HxEV (Figure S4D).

We used vector scalar values from DTI to produce tensor tract reconstructions to provide a graphical visualization of the extent of the recovery of white matter bundles facilitated by EV administration (Figure S5 shows the regions of interest where seeds were placed for the tractography). Figure 3E shows DTI-derived tracts across the corpus callosum, and Figure 3F shows a portion of the corticostriatal tract impacted by MCAO. The tractography of intact brains shows a complete reconstruction of the tract segments (Video S3). In contrast, the number of fibers that could be reconstructed in the control group was significantly limited, and the shape of reconstructed tracts is highly disorganized and atrophied. In the reconstructions of NxEV and HxEV groups, the length of assembled tracts was longer than that of their respective controls, and the number of fibers was also significantly increased.

#### Structural correlations of anatomical fibers with MRI

We evaluated the integrity of brain neuronal structural fibers by immunolabeling microtubule-associated protein 2 (MAP2) and

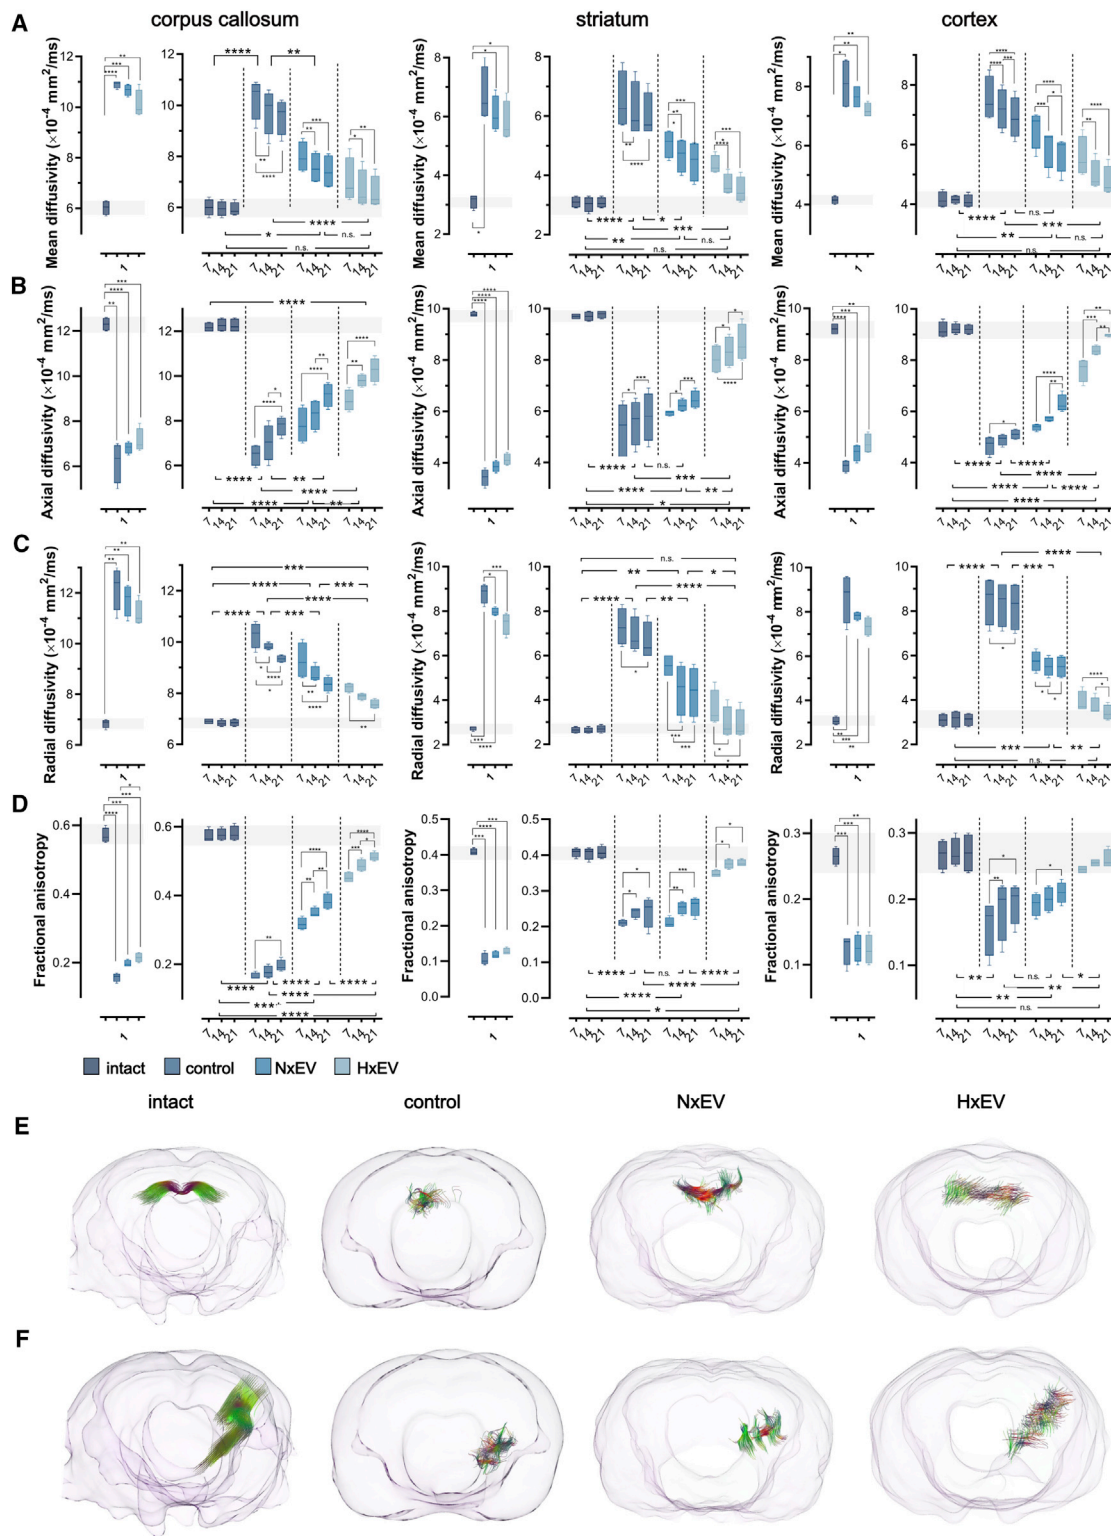

**Figure 3. Administration of astrocyte-derived exosomes preserves the structural integrity of neuronal tracts**

(A–D) Mean diffusivity (A), axial diffusivity (B), radial diffusivity (C), and fractional anisotropy (D) were determined from diffusion tensor imaging (DTI) of the ipsilateral corpus callosum (left column), striatum (middle column), and motor cortex (right column) at 1, 7, 14, and 21 days post-stroke. Boxplots on day 1 show the alterations caused by the

*(legend continued on next page)*

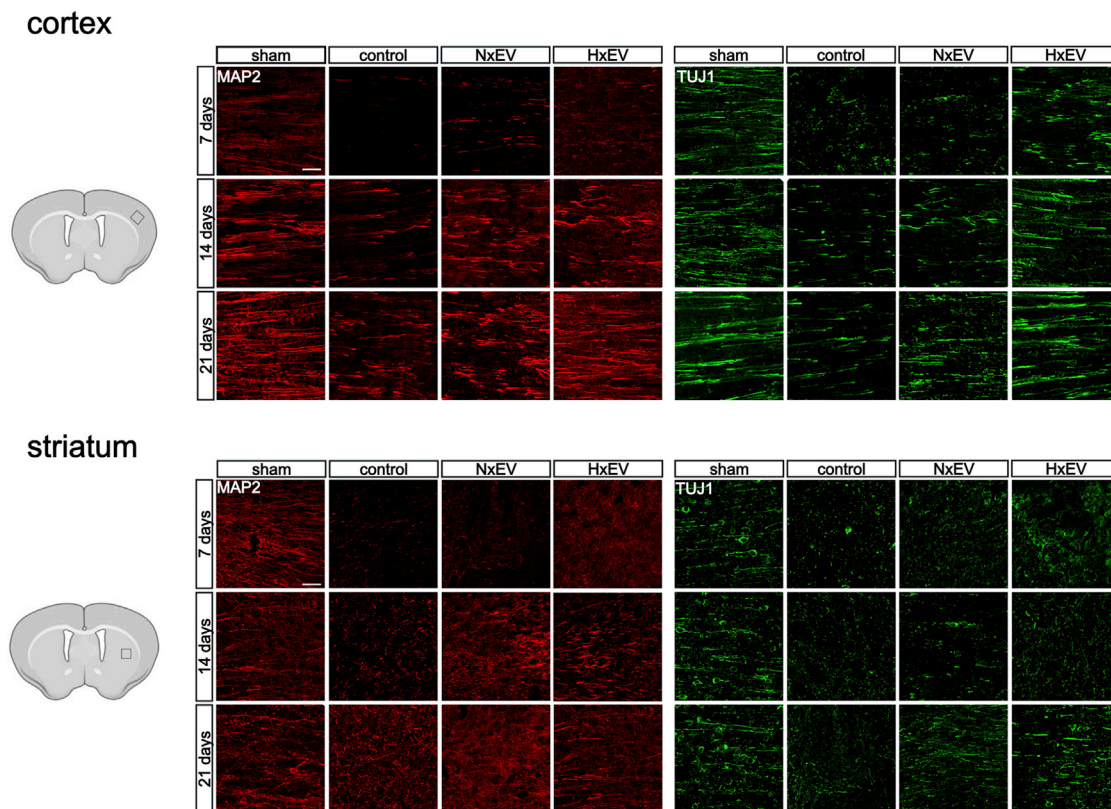

**Figure 4. The administration of astrocyte-derived exosomes promotes the recovery of the neuronal processes' integrity affected by stroke**

Representative micrographs of 40- $\mu$ m-thick immunostained sections with MAP2 (red) and TUJ1 (green) of each experimental group. Images show the evolution of the recovery of the processes in the affected motor cortex and dorsal striatum at 7, 14, and 21 days post-stroke. Microphotographs are z stack confocal projections of 10–15 optical slices. Scale bars, 50  $\mu$ m.

$\beta$ III-tubulin (Tuj1). In control animals, there was a near total loss of dendritic staining with MAP2 and all neuronal processes with TUJ1 at 7 days post-stroke (Figure 4). A gradual time-dependent recovery from this loss occurred across all groups, but only to a decidedly limited extent under control conditions. This limit was surpassed with the aid of astrocyte EVs, especially in the cortex (Figure 4). Also illustrated in Figure 4, the recovery of dendritic arborizations was greatly disorganized in the striatum of the control group animals. EVs did not help shape a better organization of the fibers by day 21, as indicated by the directionality of the tracts (Figure S6). Overall, the appearance of the neuronal processes labeled with MAP2 and Tuj1 positively correlates with the MRI parameters described above, providing a histological grounding to the determinations made by indirect measurements of DTI.

Although the administration of EVs facilitated the recovery of the gross neuronal architectural conformation of the brain, we intended to discover whether this treatment also enabled the outgrowth of axons from the lesion core in the striatum toward the innervated cortical areas. Hence, at day 14 post-stroke we injected the cholera toxin subunit B (Figure S7), which is retrogradely transported by the axons, and the fluorescent dye Dil (1,1'-diocetadecyl-3,3,3',3'-tetramethylindocarbocyanine perchlorate) (Figure 5), carried in an anterograde and retrograde fashion through the axonal transport system, and followed the localization of the fluorescent label in the innervated cortical regions at day 21 post-stroke.

Next, we determined how the innervation of the ipsilateral cortex from the dorsal striatum was modified by stroke, using two-photon

stroke in all four DTI parameters; no statistical differences exist between stroke-challenged animals treated with vehicle (control) and those that received EVs 30 min after the beginning of reperfusion. From day 7 onward, boxplots show the evolution of the recovery hastened by the administration of NxEV or HxEV. Boxplots show the minimum and maximum values within each group, the dispersion span from Q1 to Q3, and the mean;  $n = 4$ . The shaded horizontal bar in each plot marks the span of  $\pm 1$  SD of the intact group baseline values. Statistical differences of the recovery trend are indicated among groups with two-way repeated-measures ANOVA followed by Tukey's post hoc test, and changes over time within each group are also indicated with two-way ANOVA followed by Tukey's post hoc test. \* $p < 0.05$ , \*\* $p < 0.01$ , \*\*\* $p < 0.001$ , \*\*\*\* $p < 0.0001$ . (E and F) Fiber tractography produced from DTI of the corpus callosum (E) and a striatocortical tract of the ipsilesional hemisphere (F) of a representative rat of each experimental group 21 days after stroke. Colors in the tracts indicate the orientation of the fiber: transverse fibers (red), anteroposterior fibers (green), and craniocaudal fibers (blue).

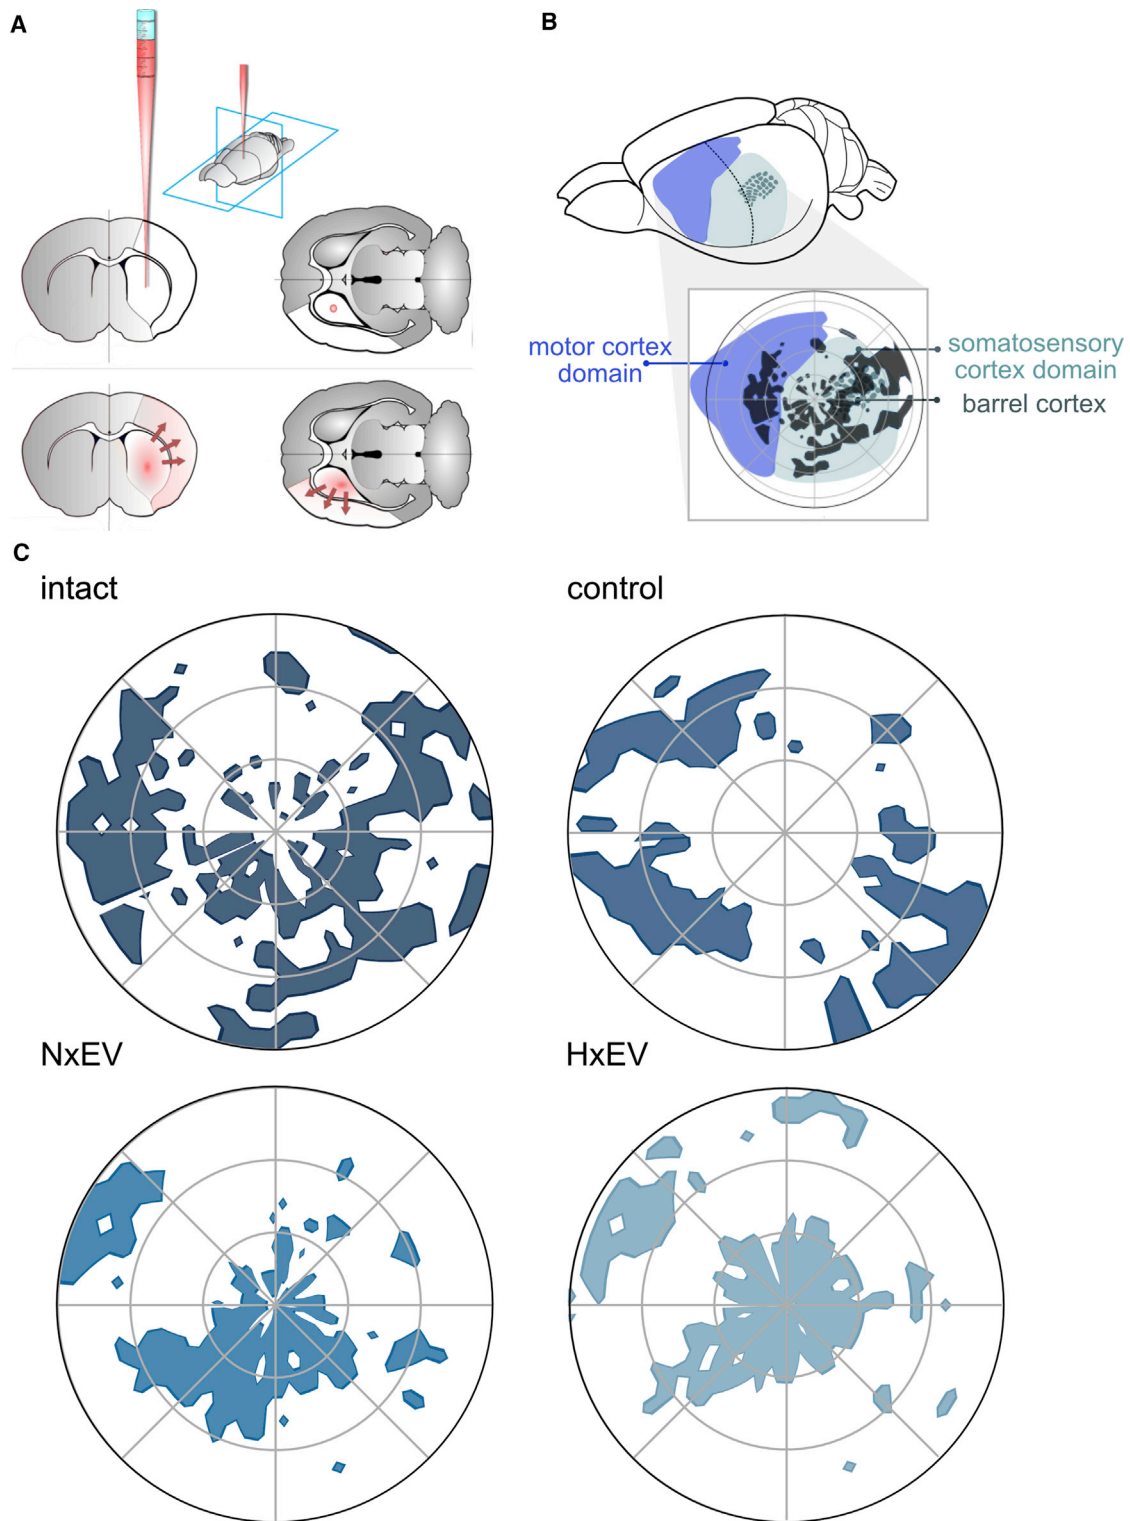

**Figure 5. Astrocyte-derived exosomes promote axonal regrowth and the reorganization of cortical innervation maps in the somatosensory cortex**

(A) Schematic representation of the administration of the fluorescent colorant Dil at 21 days post-stroke and diffusion through axonal transport during 7 days. (B) Schematic indication of the localization of polar plots shown in (C) over the cortical territories of the motor and somatosensory cortex of the rat, indicated by the

(legend continued on next page)



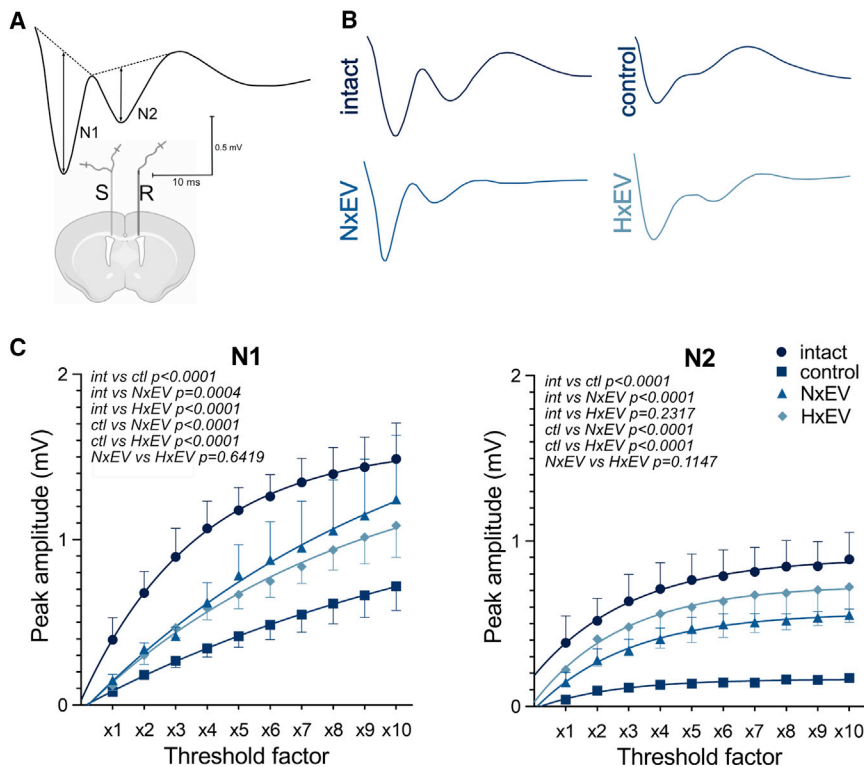

**Figure 6. Administration of astrocyte-derived exosomes augments compound action potential recovery of stroke-challenged rats**

(A) Schematic representation of electrode placement showing the stimulated (S) and recorded (R) sites in a coronal plane. CAP waveforms display early (N1) and late (N2) negative peaks generated by myelinated and unmyelinated axons, respectively. Dashed lines on CAPs explain the measurements of peak amplitudes from their projected bases. (B) Representative CAPs evoked at the maximum stimulus level under each experimental condition. (C) Plots for N1 and N2 I/O curves for intact, control, NxEV, and HxEV groups.

laser scanning confocal microscopy of the entire ipsilateral hemisphere. To achieve this,  $20 \times 20$  binned images were converted to single pixels and mapped to the cortex in a polar plot with the center located at an anatomical point identifiable by the first major split of the M4 segment of the superior MCA trunk. Overlapping the image of a slice of the corresponding preparation of the contralateral side (corrected for anatomical symmetry) stained with cytochrome *c* oxidase to distinguish the barrel cortex allowed us to map the general territories of the motor and somatosensory cortices (Figure S8). As expected, we found that the stroke caused a drastic loss of striatal projections to the somatosensory and motor cortices. Whereas the administration of EVs did not necessarily rescue the lost innervations, it promoted the reorganization of innervated cortical areas that instead preferentially targeted the parietal somatosensory cortex (Figure 5). The patterns reorganized by EVs were notably similar between normoxia and hypoxia. The motor cortex was predominantly spared in our experiments, possibly owing to the small infarct size on days 14 and 21 (Figure 2).

#### Functional axonal regeneration of the corpus callosum

The corpus callosum is the most prominent white matter tract in the mammalian brain, making this structure suitable for the

measurement of field potentials in fiber populations. The compound action potentials (CAPs) of the corpus callosum have a two-phase trace with two negative peaks, with the first one (N1) representing the myelinated fibers and the second one (N2) representing the unmyelinated fibers<sup>25</sup> (Figures 6A and 6B). The amplitude of CAPs evoked in the corpus callosum reflect the number of contributing axons. The input-output (I/O) relationship of CAPs evoked in the corpus callosum of the animals showed that administration of EVs at 30 min post-injury resulted in significant recovery of CAP amplitude, and this effect was more pronounced in the N2 than the N1 CAP component (Figure 6C), thus revealing a greater susceptibility of myelinated fibers to injury. The I/O curves for N1 and N2 amplitudes in the control group were significantly shifted downward relative to all other groups, indicating an injury-induced reduction of evoked action potentials in the myelinated and unmyelinated axon populations, respectively. In rats from the NxEV and HxEV groups, the N1 and N2 CAP amplitudes were significantly elevated above those of the control group, indicating a favorable degree of neurorestoration of myelinated and unmyelinated fibers. This was more prominent in non-myelinated fibers, revealing a greater susceptibility of myelinated axons.

The results obtained through the I/O curve measurements reveal a similar recovery pattern to that observed in FA analysis of samples from the corpus callosum (21 days, i). Likewise, there was a remarkable correspondence between electrophysiological results (CAPs for N1 at  $10\times$ , ii) and the functional recovery (combined neurological score at 21 days, iii) reported in the present study. Pearson correlation values were as follows:  $r_{i,iii} = 0.992$ ,  $p = 0.04$ ;  $r_{i,ii} = -0.991$ ,  $p = 0.043$ ; and  $r_{i,iii} = -1$ ,  $p = 0.003$ .

localization of the barrel cortex (see Figure S8). Polar plots of the striatal innervation to the cortex in a representative rat of each group. Each two-photon-captured stack's maximum projection was converted to the pixels' Cartesian coordinates meeting the threshold set (percentile 90–95 of positive signal). Origin (0,0) was set to the first branch split of the M4 segment in the MCA's superior trunk. Notice the stroke impact of the somatosensory cortex and the reorganization of the cortical maps produced by EVs.

### Identification of molecular mediators of axonal remapping within astrocyte-derived EV cargo

For the last part of this study, we set out to identify the possible molecular mediators of axonal regeneration contained in EVs released from astrocytes. To determine this, we performed a meta-analysis of three protein datasets from previously published astrocyte exosome-derived proteomes with  $n = 19$ ,<sup>26</sup>  $n = 107$ ,<sup>27</sup> and  $n = 219$ <sup>28</sup> identified proteins (Figure 7A). We also performed a Gene Ontology (GO) over-representation test with R (3.6.3) package clusterProfiler.<sup>29</sup> Subsequently, we selected eight biological process (BP) GO terms related to axonal growth and synaptogenesis, including synapse organization, response to axon injury, regulation of synapse structure or activity, postsynaptic cytoskeleton organization, postsynapse organization, neuron projection extension, modification of synaptic structure, and axonogenesis (Figure 7B). Unique proteins belonging to these eight BP GO terms ( $n = 39$ ) were analyzed using STRING with a minimum interaction score of 0.900 and k-means clustering of 3 (Figure 7C). Astrocyte exosome-derived proteomic datasets and all GO overrepresentation terms can be found in Data S1.

## DISCUSSION

How astrocytes react to ischemic damage after stroke is a complex biological process that involves a coordinated response from a heterogeneous cell population across multiple phases. In this study, we report that astrocytes produce and release EVs loaded with chemical cues that prompt the axonal remapping of cortical areas damaged by stroke. Importantly, we determined that astrocytes subjected to hypoxic stress release EVs with an increased capacity for repair. Lastly, we found that this mechanism of intercellular communication accelerated the spontaneous recovery of experimental subjects in the subacute phase following stroke. The molecular link between astrocyte-produced biomolecules transmitted in EVs and functional recovery from stroke has not been established before.

The MCAO procedure used in the present study primarily affects motor coordination and stimuli perceptual integration, coded in the circuits of the somatosensory cortex and thalamus.<sup>30</sup> The subcortical damage affects functional connectivity in the somatosensory cortex, which correlates with cortical activations after electrical stimulation of the affected forelimbs.<sup>31</sup> Previous work shows that distinct sensorimotor pathways have a significant loss of connectivity 2 weeks after stroke in the rat.<sup>32</sup>

During spontaneous recovery, the reorganization of axonal connections and the overall histological patterns of the brain involve either compensation or repair, and the latter is considered to reflect functional recovery.<sup>33</sup> With work performed on stroke preclinical models, we know that the mechanisms for spontaneous recovery include promoting new brain cortical maps through axon sprouting, remyelination, and blockade of extracellular inhibitory signals.<sup>34,35</sup> After a stroke, axonal growth and repair mechanisms establish new projections in the contralesional hemisphere. The axonal sprouting triggered by stroke generates new local intracortical projections as well as long inter-hemispheric projections,<sup>36</sup> which have been associated

with functional recovery.<sup>37</sup> By engaging both the ipsilateral and contralateral hemispheres, the rostral and caudal portions of the motor cortex are involved in coordinating the skilled reaching performance in the rat.<sup>38</sup> In humans, the contralesional motor cortex plays a central role in the recovery of motor function,<sup>39</sup> but acute cortical reorganization following focal ischemia appears to occur less rapidly than in rodents.<sup>40</sup>

Regarding the activators of these repair processes, endogenous cellular and molecular processes occurring during a limited time window promote a regenerative microenvironment in the post-acute ischemic phase. Physiologically, the axon growth cone that covers the terminal zone of neuritic processes is assembled, and, along with the reorganization of the cytoskeleton in the proximal axon stump, initiates the regeneration process.<sup>41</sup> Growth cone formation and axon growth progression are regulated by extracellular factors and intracellular signaling molecules.<sup>42,43</sup> In addition, it is known that neurons endure profound changes in their transcriptional profile in the subacute phase after stroke, which enables them to undergo plasticity changes,<sup>44</sup> and astrocytes activate a transcriptional profile that favors the expression of repairing genes.<sup>45</sup> We hypothesize that astrocytes signal neurons to activate the regenerative mechanisms through intercellular signaling driven by EVs. This type of communication mechanism has recently been shown to be capable of directing these processes. Astrocyte-derived exosomes with prostaglandin D2 synthase expression contribute to axonal outgrowth and functional recovery in stroke by inhibiting the axon growth blocker semaphorin 3A,<sup>46</sup> providing evidence that the release of EVs from astrocyte does contribute to axonal growth signaling.

In our meta-analysis of astrocytic EV proteomes, we identified several proteins that regulate axon outgrowth and guidance, for instance: TUBB, a  $\beta$ -tubulin protein involved in axon guidance;<sup>47</sup> ACTG1, a critical protein for axogenesis, axon guidance, and synaptogenesis;<sup>48</sup> RhoA, which has been shown to restrict the initiation of neuronal polarization and axon outgrowth during development,<sup>49</sup> and whose knockdown promotes axon regeneration;<sup>50</sup> RTN4, a myelin-associated axon growth inhibitor that impairs axon regeneration in the adult mammalian CNS;<sup>51</sup> Cdc42, which targets the cytoskeleton, cell adhesion, and polarity regulators<sup>52</sup> and is involved in axon guidance;<sup>53</sup> TUBA4A and PFN1, which regulate cytoskeletal dynamics;<sup>54</sup> SPARC, a secreted protein involved in synapse pruning during development;<sup>55</sup> Rab11A, involved in axon outgrowth;<sup>56</sup> and Ephrin, whose signaling is known to modulate axon guidance and synaptic plasticity and promote long-term potentiation,<sup>57,58</sup> and whose inhibition has been targeted to augment recovery after stroke,<sup>59</sup> among others.

EVs also regulate several physiological processes by delivering microRNAs (miRNAs) to their target cells. Numerous species of these molecules, previously found in astrocyte-shed EVs,<sup>28</sup> regulate axon growth and guidance. miRNAs in distal axons of cortical neurons, such as miR15b, miR195, and miR26b, are known to integrate network regulatory systems that promote axonal growth.<sup>60</sup> Other species that block these processes, such as miR203a and miR29a,<sup>60,61</sup> are

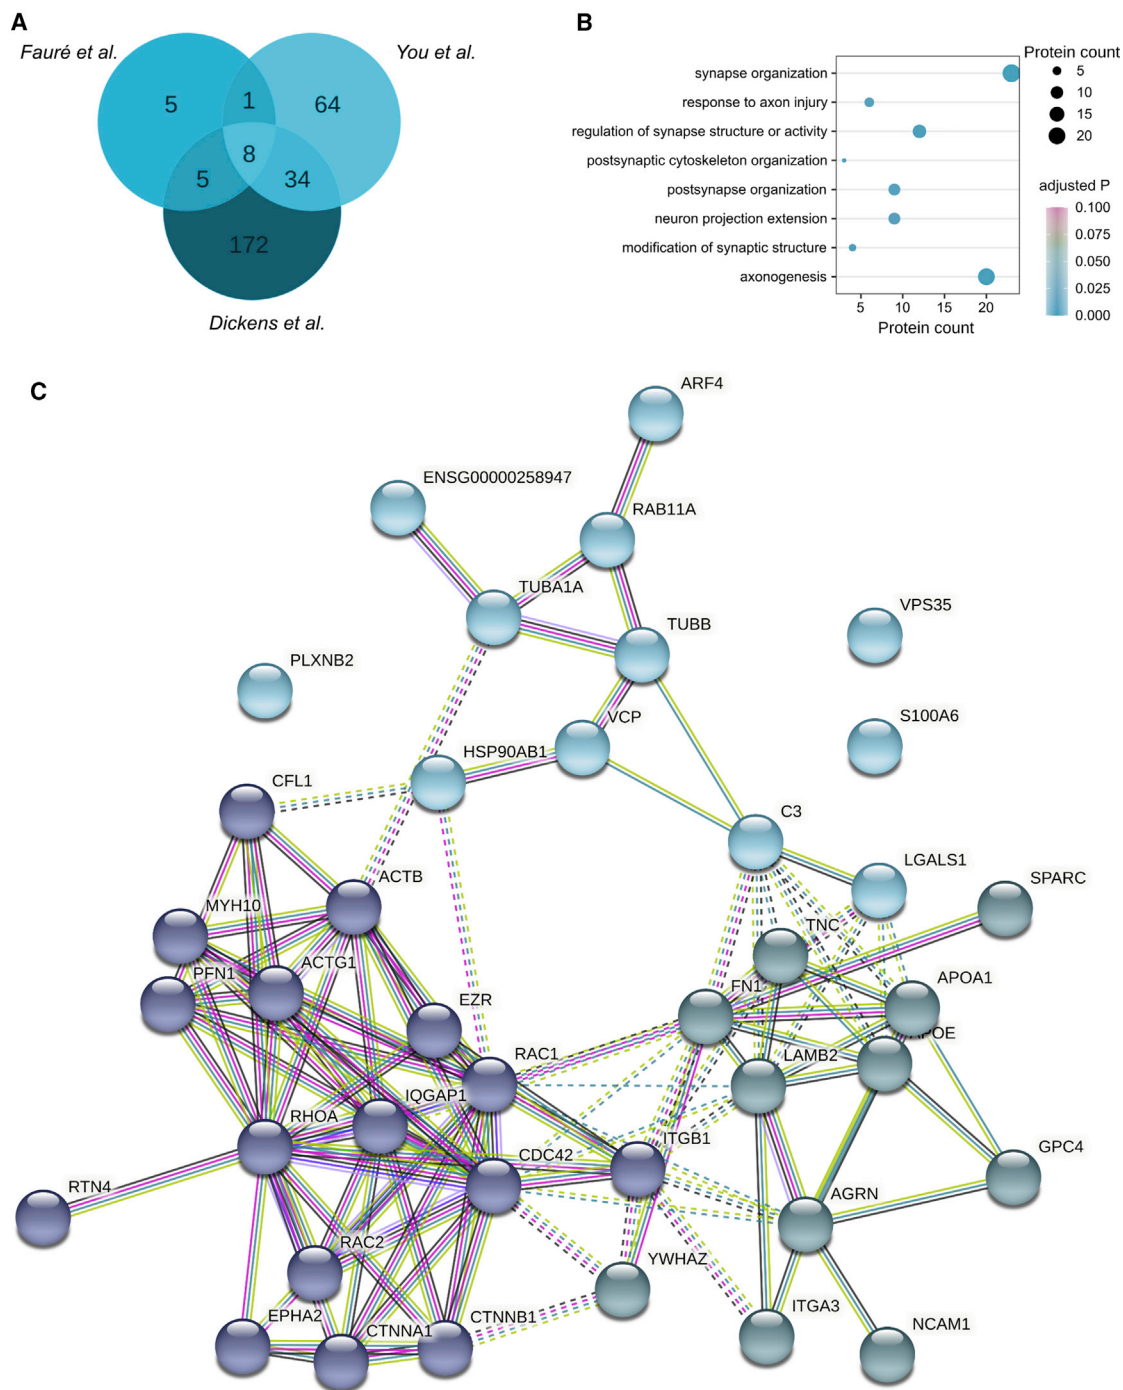

**Figure 7. Meta-analysis of astrocytic EV proteomes**

(A) Venn diagram of the three databases used for the meta-analysis.<sup>26–28</sup> (B) Biological process (BP) Gene Ontology (GO) analysis of proteins related to neuronal, axonal, and synaptic biological processes. (C) STRING analysis of the 39 proteins represented in the BP GO terms in (B), with a minimum interaction score of 0.900 and k-means clustering of 3.

decreased in EVs released from astrocytes subjected to proinflammatory signals. Nevertheless, other miRNA species, such as miR130a, indirectly regulate VEGFR2 expression,<sup>62</sup> which is also involved in

neuroadaptation following stroke.<sup>63</sup> The axon growth and guidance prompted by EVs most likely result from combining all of these different regulatory molecules within the same vesicle. The exact

mechanism of action of each miRNA contained within astrocytic EVs requires elucidation.

In response to ischemia, astrocytes also modulate the production of trophic factors with essential roles in the neuromodulation of recovery after damage,<sup>64,65</sup> mainly by regulating hypoxia-inducible factor (HIF)-1 and HIF-2<sup>66,67</sup> and nuclear erythroid related factor 2 (Nrf2).<sup>68</sup> Trophic factors such as erythropoietin,<sup>66,69</sup> vascular endothelial growth factor,<sup>70,71</sup> neurotrophin-3,<sup>72,73</sup> and nerve growth factor<sup>74</sup> not only contribute to maintaining neuronal survival but also have profound effects on axonal outgrowth. In addition, they influence axonal fibers' length and tortuosity in sensory pathways.<sup>75–77</sup> Molecular mediators that drive all of these mechanisms can, in principle, be packed and released in EVs,<sup>78</sup> increasing the potency for recovery.

We enhanced input signals for axonal growth from astrocytes under stress (HxEV) and basal conditions (NxEV), which allowed us, under a permissive environment generated by the stroke, to potentiate the endogenous process of neurite growth and cortical remapping that underlies functional recovery. The endogenous production of EV content within the brain-resident astrocytes changes dynamically throughout recovery after the ischemic insult. By delivering these vesicles 30 min after initiation of the reperfusion phase, we are likely shortening the time taken for the endogenous reparative mechanisms to commence, which is a plausible explanation for the recovery accelerating effect induced by administering astrocytic EVs. The astrocytes in culture were free from the influence of classically activated microglia, which is known to induce A1 reactive astrocytes that promote the death of neurons and oligodendrocytes.<sup>20</sup>

It is well established that the brain produces neurochemical signals that drive adaptive changes at the molecular level conferring tolerance to hypoxic stress.<sup>79</sup> In this sense, the greater efficacy of HxEV over NxEV could be attributed to preconditioning, where the exposure to a potentially deleterious stimulus at a subthreshold level increases the resistance to a repeated presentation of the challenge even at a higher magnitude. Astrocytes are oxygen level sensors in the CNS<sup>80</sup> and can thus trigger physiological responses for adaptation to environmental challenges. For this, astrocytes use diverse molecular mechanisms, for instance, switching molecular responses to increase tolerance by sensitization of P2X<sub>7</sub> receptors,<sup>67,81</sup> which are closely associated with regulating excitotoxic neuronal death.<sup>82</sup> Other mechanisms involved in the astrocyte-driven preconditioning are the blockade of astrogliosis and induction of antioxidant capacities in these cells.<sup>69</sup> Given that HxEV had higher efficacy than did NxEV in promoting functional recovery, our results support the notion that EV-mediated release of molecular cues that facilitate axonal growth and neuronal survival serves as a mechanism of intercellular communication in hypoxic preconditioning.<sup>74,83</sup>

Most astrocytes are resistant to hypoxic death;<sup>84</sup> still, in our experimental setting, the hypoxic challenge for 6 h decreases cell viability by about 30%. Thus, it is important to consider that dead and injured

cells in the culture contribute to EV yield, possibly sending molecular signals that act as damage-associated molecular patterns.<sup>85,86</sup> The proportion of cells with apoptotic markers (Figure S1) is significantly high to consider that they can potentially influence tissue recovery. Finally, it is also relevant to consider that in addition to inducing cellular death, hypoxia also changes the physiology of EV production and release.<sup>87</sup>

One of the most important findings of the present study is that astrocytes convey signals that directly reshape the innervation of affected cortical brain areas and potentiate axonal communication in impaired neuronal tracts through EVs. These effects are accompanied by neurological improvement after stroke. Previous studies have shown that astrocytes are highly heterogeneous cells, with typical types accounting for ~70% of astrocytes in culture,<sup>88</sup> promoting neuron adhesion and neurite growth, while atypical astrocytes inhibit such processes.<sup>89</sup> Reactive astrocytes, such as those that form glial scars after brain damage, potentially limit axonal growth after stroke, mainly by producing an extrinsic inhibitory environment. Our results might also reflect the enhancement of soluble signals released by repair-promoting astrocytes, and by the external administration of these EVs, we could surpass the physical inhibitory barriers promoted by reactive gliosis.

Given the dire need for suitable biomarkers for post-stroke plasticity mechanisms, we propose that astrocyte-derived particles, which can be isolated from human plasma,<sup>90,91</sup> may serve as functional markers for brain plasticity, especially in the chronic phase after stroke when neurological restoration is minimal and can only possibly be obtained by proper neurorehabilitative interventions.

In conclusion, understanding the biological basis of neurological function restoration after stroke is critical for designing intervention therapies by the exploitation of endogenously coded mechanisms for the repair of the damaged brain. The use of isolated EVs from cultured astrocytes, even if unmodified, may shorten the time required for neurological recuperation or, even more so, extend the very limited time window of spontaneous recovery and increase the proportion of functional gains in patients. Additional studies are warranted to explore the optimal time point for astrocyte-derived EV administrations and the optimally effective and safe way to deliver them to the damaged brain.

## MATERIALS AND METHODS

### Animals

This study used young 6-week-old (270–290 g) wild-type Wistar rats subjected to MCAO as described below. Rats were bred at the Animal Facility of IFC-UNAM certified by the Secretariat of Agriculture and Rural Development (SADER-Mexico). Animals were housed in individual cages in a 12-h light/12-h dark cycle with food and water *ad libitum*. Rats were killed at 1, 7, 14, and 21 days post-stroke. All experimental procedures were conducted under the current Mexican law for the use and care of laboratory animals (NOM-062-ZOO-1999) with the approval of the Institutional Animal Care and Use

Committee (CICUAL-IFC-LTR93-16). Experiments are reported in compliance with the Updated Animal Research: Reporting *In Vivo* Experiments (ARRIVE 2.0) guidelines.<sup>92</sup>

### Study design

We conducted this study in the setting of ischemia/reperfusion-induced damage to the brain in the absence of hemorrhagic conversion. The sample size used was determined *a priori* based on pilot experiments. Considering a medium Cohen's *d* effect size >0.3, statistical  $\beta$  power of 0.8, and significance of 0.05, we determined that  $n = 4$  would allow us to reject the null hypothesis (no effect) with 95% confidence. The mortality rate was assumed to be 0.4 based on pilot experiments. The inclusion criteria consider the analysis of experiments that recapitulate full ischemia/reperfusion without brain hemorrhage. An experiment met the inclusion criteria when there was a reduction of blood perfusion below 50% of baseline, which roughly corresponds to the effect of occluding the common carotid artery, reperfusion above 50% baseline within 10 min, total occlusion time of 60 min, absence of subarachnoid or intraparenchymal hemorrhages, and survival for 24 h after stroke. For humane reasons, experiments were terminated when animals presented with hemiplegia or generalized weakness that made them unable to eat or drink autonomously within 24 h of stroke; those animals were considered dead before 24 h.

We used a total of 140 rats in this study, of which 21 died before 24 h (19 control, 1 NxEV, and 1 HxEV). Because survival at 24 h was an inclusion criterion, none of these rats was considered in any analyses. Thirty-six other animals were excluded from the study (22 control, 9 NxEV, 5 HxEV) because they did not show reperfusion above 50% of baseline within 10 min or presented brain hemorrhage. All of the observations (i.e., MRI, histology, and electrophysiological CAP recordings) were run in independent experiments, except for the longitudinal MRI assessments at 7, 14, and 21 days that followed the same individuals across time. The characterization of axonal growth and construction of polar maps was performed in a single experiment per condition. This study is limited to assess effects on male rats to prevent potential confounds of estrogen-mediated neuroprotective actions present in female rodents.<sup>93</sup>

### MCAO

Ischemic stroke was performed as previously reported with slight modifications.<sup>63</sup> Briefly, rats were subjected to isoflurane anesthesia (5% for induction followed by  $\leq 1.5\%$  during surgery) with oxygen as the carrier. Normal ventilation was autonomously maintained. A nylon monofilament with a silicone-covered tip (403734, Doccol, Sharon, MA, USA) was inserted through the ligated left external carotid artery, and intraluminally advanced through the internal carotid artery until it occluded the MCA. The occlusion was maintained for 60 min, after which the monofilament was removed. Body temperature was maintained at 37°C with a heating pad for the duration of surgery. At the end of the procedure, the neck's skin was sutured, and rats were returned to their cages. During the entire experimental procedure, the cerebral blood flow (CBF) was moni-

tored in the territory irrigated by the MCA with laser-Doppler flowmetry at the following stereotaxic coordinates: anterior-posterior (AP)  $-1.5$  L  $+3.5$  from bregma, with a laser-Doppler probe (model 407, Perimed, Järfälla, Sweden) connected to a Periflux system 5010 (Perimed). CBF was continuously monitored with an acquisition interval of 0.3 s using Perisoft software (Perimed).

### Primary astrocyte cell culture

Primary cortical astrocyte cell cultures were prepared and maintained using methods similar to those described previously.<sup>28</sup> Briefly, astrocytes were isolated from the cerebral cortices of postnatal day 1–2 Wistar rats. The tissue was digested with trypsin and subsequently mechanically dissociated in Hanks' balanced salt solution. The cell suspension was plated in poly-D-lysine culture flasks containing Dulbecco's modified Eagle's medium/F-12 medium (Gibco-BRL) and 10% fetal bovine serum (FBS) (Gibco-BRL). 24 h after plating, the cultures were shaken at 200 rpm at 37°C overnight to remove less-adherent cells, with the remaining cells determined to be  $\sim 98\%$  GFAP<sup>+</sup> astrocytes. Experiments were performed between three to five passages.

Cell viability was determined with an apoptosis/necrosis assay kit (ab176749, Abcam, Cambridge, UK) under normoxic, hypoxic (6 h), and recovery (6 h hypoxia followed by 42 h recovery) conditions. Cultured astrocytes were incubated with 2  $\mu$ L of each marker (CytoCalcein, 7-aminoactinomycin D [7-AAD], and Apopxin PS sensor) for 60 min. After incubation, cells were harvested with a cell scraper, centrifuged, and resuspended in 1.5 mL of culture medium, then loaded and analyzed in an Attune acoustic focusing cytometer (Thermo Fisher Scientific) with a 530/30 band for Apopxin, a 640LP band for 7-AAD, and a 450/40 band for CytoCalcein. In three independent experiments, standard singlet forward scatter area (FSC-A)/forward scatter height (FSC-H) and size and granularity FSC-A/side scatter area (SSC-A) gates were placed, and cell populations were analyzed for each of the three compensated fluorescent markers with at least 10,000 cells per experiment in FlowJo 10.8. The CytoCalcein<sup>+</sup> cells were considered "live" regardless of the presence of the other cell markers (Figure S1). Cells were classified as apoptotic (Apopxin<sup>+</sup>), necrotic (7-AAD<sup>+</sup>), or necrotic/apoptotic (Apopxin<sup>+</sup>/7-AAD<sup>+</sup>) in the absence of CytoCalcein.

### EV isolation and characterization

EVs were purified from astrocyte cell culture supernatants under two experimental conditions: incubated for 48 h under normoxic conditions (NxEV) or for 6 h under hypoxia, followed by 42 h for recovery in normoxia (HxEV). For hypoxia, cultures were incubated inside a hypoxic chamber (STEMCELL Technologies, Canada) with a 100% N<sub>2</sub> atmosphere for 6 h at 37°C. For the collection of exosomes secreted exclusively by astrocytes, a conditioned medium was prepared with exosome-free FBS. The conditioned medium was recovered and filtered with a 220-nm-pore membrane to remove large cell debris, microvesicles derived from plasma membrane with a diameter greater than 220 nm, and large apoptotic bodies. The supernatant was collected and sequentially ultracentrifuged at 50,000  $\times g$

for 30 min, followed by  $100,000 \times g$  for 70 min. The purified vesicles were resuspended in 100  $\mu$ L of PBS.

A fraction of the resuspended vesicles was diluted 1:50 for nanoparticle tracking analysis (NTA) measurement by NanoSight (NS300, Malvern Panalytical, UK) at the National Laboratory of Flow Cytometry (IIB-UNAM, Mexico). Vesicle size was determined by estimating the diffusion coefficient calculated from the Brownian motion direct observation using the Stokes-Einstein equation and depicted as a size histogram. Both acquisition and analysis settings were kept constant for control and hypoxic samples.

For the characterization by transmission electron microscopy, 2  $\mu$ L of EV suspension was loaded onto glow-discharged 400-mesh copper/carbon-coated grids and left to settle for 5 min. After a brief wash with drops of distilled water, the grids were stained in 2% uranyl formate for 1 min and blow-dried on Whatman filter paper. Exosomes were examined with a JEOL-JEM-1200 transmission electron microscope at an accelerating voltage of 80 keV.

The expression of the exosome canonical marker CD63 was determined by western blot. The quantification of protein content in exosome suspensions and whole-cell lysates was undertaken by a modified Lowry assay (detergent-compatible [DC] protein assay, Bio-Rad). For immunoblotting, sample preparation was performed in Laemmli buffer, and 5  $\mu$ g of each protein was resolved by 7.5% SDS-polyacrylamide gel electrophoresis and transferred to polyvinylidene fluoride membranes. Membranes were blocked with 5% bovine serum albumin (BSA) in Tris-buffered saline (TBS) containing 0.1% Tween 20. After blocking, the membrane was incubated overnight with the primary polyclonal antibody anti-CD63 (1:200; Santa Cruz Biotechnology, sc-15363), followed by a 2-h incubation with the secondary horseradish peroxidase (HRP)-conjugated goat anti-rabbit antibody (1:200; GeneTex, GTX213110). Following incubation with the Immobilon forte substrate (EMD Millipore), the blot was scanned on a C-DiGit apparatus (LI-COR Biosciences).

#### Administration of astrocyte-derived EVs in the brain

A 4- $\mu$ L vol of an exosome suspension in phosphate buffer was administered by intracerebroventricular (i.c.v.) injection in the corresponding animal groups 30 min after removing the intraluminal filament in the MCAO procedure, which marked the beginning of reperfusion. The injection was performed at the following stereotaxic coordinates: AP  $-0.8$  and L  $-1.5$  from bregma and V  $-4$  from dura matter at a flux rate of 0.8  $\mu$ L/min using a graduated glass microcapillary pipette pulled to produce a tip  $<50$   $\mu$ m in diameter. The number of exosomes administered in each experiment contained equal quantities of total protein in the range of 400 ng.

For the characterization of the distribution and bioavailability of EVs injected in the brain, we stained them with PKH26 (Sigma-Aldrich), per the manufacturer's directions, and proceeded to i.c.v. injection. We determined the presence of labeled EVs in the brain at 2 and 24 h after their administration by evaluating 40- $\mu$ m paraformaldehyde (PFA)-fixed coronal brain slices. Sections were blocked and permeabilized with 0.5% TBS with Tween 20 (TBS-T) and 5% BSA and incubated overnight at 4°C with primary antibodies anti-MAP2 (1:500; Abcam, ab32454) and anti-GFAP (1:500; Sigma, G3893), and, after three washes, secondary Alexa Fluor 647-conjugated goat anti-rabbit and Alexa Fluor 488-conjugated anti-mouse antibodies (1:500 each), as well as DAPI (1:10,000; Thermo Fisher Scientific). The preparations were examined by confocal microscopy with an LSM 800 microscope (Zeiss, Jena, Germany) using a  $\times 63$  oil immersion objective.

hyde (PFA)-fixed coronal brain slices. Sections were blocked and permeabilized with 0.5% TBS with Tween 20 (TBS-T) and 5% BSA and incubated overnight at 4°C with primary antibodies anti-MAP2 (1:500; Abcam, ab32454) and anti-GFAP (1:500; Sigma, G3893), and, after three washes, secondary Alexa Fluor 647-conjugated goat anti-rabbit and Alexa Fluor 488-conjugated anti-mouse antibodies (1:500 each), as well as DAPI (1:10,000; Thermo Fisher Scientific). The preparations were examined by confocal microscopy with an LSM 800 microscope (Zeiss, Jena, Germany) using a  $\times 63$  oil immersion objective.

#### Behavioral testing

Animals were evaluated with a battery of neurological tests to assess sensorimotor deficits at 24 h and 7, 14, and 21 days after stroke. The severity of functional deficits was scored by assessing eight items described in Table 1. All evaluations were cross-validated by a trained observer blinded to the experimental treatment that analyzed the tests' recorded videos.

#### MRI

MRI scans were acquired at 7, 14, and 21 days after MCAO with a 7-T MRI system (Varian), and assessments made at 24 h were performed with a 7-T MRI system (Pharmascan 70/16; Bruker, Ettlingen, Germany) on animals anesthetized with isoflurane (5% for induction followed by  $\leq 2\%$  during image acquisition). T2-weighted images were obtained with a fast spin-echo sequence: echo time (TE)/repetition time (TR), 35.47/3714 ms; field of view (FOV), 64  $\times$  64 mm; matrix, 256  $\times$  256; voxel resolution, 250  $\mu$ m per side; slice thickness, 0.5 mm. T1-weighted images were acquired with a 3D gradient-echo sequence with the same orientation and resolution (TE/TR, 2.3/4 ms). Diffusion-weighted images were acquired using a spin-echo echo-planar imaging sequence: TE/TR, 30.5/2,500 ms; FOV, 64  $\times$  64 mm; matrix, 64  $\times$  64; slice thickness, 1 mm, yielding isometric voxel resolution of 1 mm per side; diffusion gradient directions, 6; diffusion gradient duration ( $\delta$ ), 5 ms; and b-value, 800 s/mm<sup>2</sup>. An additional b = 0 s/mm<sup>2</sup> image was acquired with the same parameters.

#### DTI

The diffusion tensor was fitted at each voxel for DTI analysis using DSI Studio (<http://dsi-studio.labsolver.org/Manual/diffusion-mri-indices>; December 6, 2015). Next, tractography was performed using a deterministic fiber-tracking algorithm.<sup>94</sup> Seed regions were placed at the striatum and corpus callosum. The anisotropy threshold was 0.21, and the angular threshold was 30°. The step size was 0.7 mm; averaging the propagation direction with 30% of the previous direction smoothed the fiber trajectories. A total of reconstructed streamlines (tracts), axial diffusivity, mean diffusivity, and radial diffusivity, were calculated by area.

#### Immunofluorescence and confocal microscopy

For immunohistological analyses, three rats per group were anesthetized with pentobarbital (100 mg/kg) and transcardially perfused with 200 mL of ice-cold 0.9% NaCl followed by 250 mL of ice-cold 4% PFA. Brains were collected and post-fixed in 4% PFA for 24 h and

then cryoprotected in 30% sucrose. Whole PFA-fixed brains were cut into 40- $\mu\text{m}$ -thick sections in a cryostat to produce 10 series of consecutive sections that were 400  $\mu\text{m}$  apart. Brain sections containing infarct core and penumbra were blocked with 5% BSA in TBS with 0.5% (v/v) Triton X-100 (TBS-T) and incubated with anti-MAP2 (1:200; Invitrogen, PAS-17646) and anti-TUJ-1 antibodies (1:200; Merck Millipore, MAB380) for 48 h. Sections were washed three times with TBS followed by a 2-h incubation at room temperature (RT) with Alexa Fluor 488-conjugated anti-mouse and Alexa Fluor 546-conjugated anti-rabbit antibodies (1:300 each; Thermo Fisher Scientific, A32723, A11035) in TBS. Images were obtained in a Zeiss LSM 800 confocal microscope using a  $\times 20$  objective. An average of 40  $\mu\text{m}$  for each z stack was obtained, every 0.5  $\mu\text{m}$  of optical sectioning.

### Axonal mapping

To determine the effect of EVs in neuronal projections recovered over time, we injected 2  $\mu\text{L}$  of 1% (w/v) fluorescein isothiocyanate (FITC)-conjugated cholera toxin B subunit (Sigma, C1655) in rats subjected to MCAO on day 14 post-stroke and analyzed the distribution of the labeling by confocal microscopy at 21 days post-stroke. In a separate series of experiments, one rat of each group subjected to MCAO was administered 0.5  $\mu\text{L}$  of 0.02% Dil in 0.1% DMSO in the striatal core of the infarction (AP  $-0.1$ , medial-lateral [ML] 2.0, and dorsal-ventral [DV]  $-4.2$ ) on day 14 after MCAO. On day 21, the animals were intracardially perfused as indicated above with 4% PFA. The cortical hemispheres were collected, and the ipsilateral hemicortex was flattened as previously described.<sup>95</sup> The flattened cortices were clarified in a sucrose gradient (15%, 30%, 45%, 60%, and 75%) with Triton X-100 (0.4%, 0.6%, 0.8%, and 1%) for 15 days per stage. For two-photon microscopy, the flattened cortices were immersed in 2% agarose between glass slides and scanned with a Zeiss LSM 710 microscope to acquire a series of images in a stack of the whole cortex using a C-Apochromat 10 $\times$ /0.45 W M27 objective with a pixel dwell of 6.3 ms at a wavelength of 860 nm.

Stack maximum intensity projections for each image were binned in a 20  $\times$  20 square calculating the pixels' median intensity inside each bin to create a new pixel. The images were processed for noise reduction using a scikit-image median filter,<sup>96</sup> calculating the median pixel value in a 2-pixel-radius disk. We set a threshold filter at percentile 90–95 of the pixel values for establishing the positive signal intensity and kept only the pixels with the highest values. The pixel Cartesian coordinates were then obtained, setting the center (0,0) at the first branch split of the M4 segment in the MCA's superior trunk in the barrel cortex, identified by cytochrome oxidase staining (Figure S8). This point was considered as the origin of the polar transformation. All of the processing and plotting were undertaken with *ad hoc* Python scripts available at [https://github.com/TYR-LAB-MX/PolarPlot\\_HerasRomero\\_2021](https://github.com/TYR-LAB-MX/PolarPlot_HerasRomero_2021).

### In vivo electrophysiological recording

I/O curves were assessed 21 days after stroke. For this, animals (n = 4 per group) were anesthetized with 5% isoflurane for induction, followed by  $\leq 2\%$  during surgery. Body temperature was maintained at 35°C with

heating pads. Rats were placed on a stereotaxic frame, and the skull was exposed. A constant current was delivered by direct and unilateral stimulation of the corpus callosum using a bipolar stainless-steel electrode placed at the stereotaxic coordinates AP +0.2, ML  $-1.0$ , DV  $-3.7$  from bregma, with a Grass S48 stimulator and a photoelectric stimulus isolation unit Grass PSIU6 (Grass Instrument Co., Quincy, MS, USA). Corpus callosal responses were recorded unilaterally with a monopolar stainless-steel electrode (127  $\mu\text{m}$  in diameter) placed at the stereotaxic coordinates AP +0.2, ML +1.0, DV  $-3.7$  from bregma. The evoked responses were measured with the CAP amplitude, measured in negative peak 1 (N1) and peak 2 (N2). I/O curves were built with threshold folding of intensity (1–10 $\times$ ) to determine the axonal conduction for a range of stimulation intensities. The threshold was defined at the stimulation intensity required to produce a 0.10 mV amplitude response in N1. The electric signal was digitalized, stored, and analyzed using DataWave SciWorks (Broomfield, CO, USA).

### Statistical analysis

GraphPad Prism 8 was used to analyze all *in vivo* data. The normal distribution in each dataset was corroborated using the Shapiro-Wilk normality test. Neurological scores and DTI parameter changes among experimental groups and over time within each group were tested on a two-way analysis of variance (ANOVA) with repeated measures based on a general linear model, followed by Tukey's post hoc test. Data were considered significant at  $\alpha \leq 0.05$ . For the cell viability assays, two-way ANOVA was performed in R 3.6.3 with treatment and condition as independent variables, and the adjusted p value was calculated with a pairwise Tukey's honestly significant difference (HSD) post hoc test.

### Data availability

The datasets used and/or analyzed during the current study are available from the corresponding author on reasonable request.

### Ethics statement

All of the animal experimentation was carried out at the Universidad Nacional Autónoma de México in Mexico City and Juriquilla Qro., Mexico, in accordance with the Mexican law for the use and care of laboratory animals (NOM-062-ZOO-1999) with the approval of the Institutional Animal Care and Use Committee (CICUAL-IFC-LTR93-16), and is in compliance with the guidelines for animal experimentation of the National Research Council (Committee for the Update of the Guide for the Care and Use of Laboratory Animals, 2011) and the National Institutes of Health of the United States (US Department of Health, Education, and Welfare [DHEW] publication 85-23, revised 1995).

### SUPPLEMENTAL INFORMATION

Supplemental information can be found online at <https://doi.org/10.1016/j.ymthe.2021.09.023>.

### ACKNOWLEDGMENTS

We thank Cristina Aranda Fraustro and Dr. Alfredo Cárdenas for assistance with experimental procedures, Dr. Alicia Güemez-Gamboa

(Northwestern University) and Elliot Glotfelty (NIA/NIH, Karolinska Universitat) for critically reviewing the manuscript, Dr. Abraham Rosas-Arellano for assistance with the acquisition of confocal images and post-processing, Dr. Yazmín Ramiro-Cortés and Gerardo Perera for expert assistance with two-photon image acquisition, Dr. Laura Ongay-Larios for assistance with flow cytometry, Claudia Rivera-Cerecedo for animal care, Daniela Rodríguez-Montañón for assistance with histological sample preparations, the National Laboratory for Magnetic Resonance Imaging, particularly Dr. Juan Ortiz-Retana, for technical assistance, and Dr. Gloria Soldevila and Dr. Cynthia López Pacheco of the Laboratorio Nacional de Citometría de Flujo (IIB-UNAM) for helpful assistance with NTA. L.B.T.y.R. is deeply grateful to Pilar Martínez, Mario Arredondo, Claudia Islas, Pablo Montiel, and Angel Cedillo for outstanding assistance with the administrative burden that kept the laboratory running during the difficulties that arose through the COVID-19 pandemic shutdown. Y.H.-R. conducted this study in partial fulfillment of the requirements of the Programa de Doctorado en Ciencias Biomédicas of Universidad Nacional Autónoma de México. This work was supported by the Programa de Apoyo a Proyectos de Investigación e Innovación Tecnológica, Dirección General de Asuntos del Personal Académico (PAPIIT-DGAPA grants IN226617 and IN207020 to L.B.T.y.R., and IN215719 to M.L.E.), Consejo Nacional de Ciencia y Tecnología (CONACYT; grants CB219542 and A1-S-13219) administered through the “Fondo Sectorial para la Investigación en Educación SEP-CONACYT” trust fund, the Committee for Aid and Education in Neurochemistry of the International Society for Neurochemistry (category 1B grant [2019]), and by International Brain Research Organization Return Home Program (2014) grants to L.B.T.-y.-R. Y.H.-R., B.B.-V., and A.C.-R. were recipients of doctoral scholarships from CONACYT (428473, 290915, and 277660), and R.S.-M. received a postdoctoral stipend from DGAPA. P.M.-C. and N.H.G. are supported by the Intramural Research Program of NIA/NIH (USA).

#### AUTHOR CONTRIBUTIONS

Y.H.-R. and L.B.T.y.R. conceived the project and designed the experiments. Y.H.-R. performed the MCAO surgeries. Y.H.-R., A.M.-G., and L.C. performed MRI assessments, and A.M.-G. produced the tractography. R.S.-M. made two-photon sample preparation and acquisition, and A.C.P.-H. and R.R.-H. analyzed the images and produced polar plots. I.P. carried out the proteomic meta-analysis and the astrocyte viability assays. Y.H.-R. and R.R.-H. made histological sample preparations and image acquisition. A.N.C.-R. performed the exosome characterization, and B.N.B.-V. analyzed the distribution of EVs in the brain. Electrophysiological experiments were performed by Y.H.-R., A.M.-M., E.U., and M.L.E. Y.H.-R., A.M.-G., R.R.-H., A.C.P.-H., P.M.-C., N.H.G., M.L.E., L.C., and L.B.T.y.R. analyzed the data. L.B.T.y.R. wrote the manuscript with input from Y.H.-R., P.M.-C., N.H.G., M.L.E., and L.C. All authors read and approved the final version of the manuscript.

#### DECLARATION OF INTERESTS

The authors declare no competing interests.

#### REFERENCES

- Virani, S.S., Alonso, A., Benjamin, E.J., Bittencourt, M.S., Callaway, C.W., Carson, A.P., Chamberlain, A.M., Chang, A.R., Cheng, S., Delling, F.N., et al.; American Heart Association Council on Epidemiology and Prevention Statistics Committee and Stroke Statistics Subcommittee (2020). Heart Disease and Stroke Statistics—2020 update: A report from the American Heart Association. *Circulation* *141*, e139–e596.
- Ouriques Martins, S.C., Sacks, C., Hacke, W., Brainin, M., de Assis Figueiredo, F., Marques Pontes-Neto, O., Lavados Germain, P.M., Marinho, M.F., Hoppe Wiegner, A., Vaca McGhie, D., et al. (2019). Priorities to reduce the burden of stroke in Latin American countries. *Lancet Neurol.* *18*, 674–683.
- Arauz, A., Marquez-Romero, J.M., Barboza, M.A., Serrano, F., Artigas, C., Murillo-Bonilla, L.M., Cantú-Brito, C., Ruiz-Sandoval, J.L., and Barinagarrementeria, F. (2018). Mexican-National Institute of Neurology and Neurosurgery-Stroke Registry: Results of a 25-year hospital-based study. *Front. Neurol.* *9*, 207.
- Rathore, S.S., Hinn, A.R., Cooper, L.S., Tyroler, H.A., and Rosamond, W.D. (2002). Characterization of incident stroke signs and symptoms: findings from the atherosclerosis risk in communities study. *Stroke* *33*, 2718–2721.
- Cassidy, J.M., and Cramer, S.C. (2017). Spontaneous and therapeutic-induced mechanisms of functional recovery after stroke. *Transl. Stroke Res.* *8*, 33–46.
- Ward, N.S. (2017). Restoring brain function after stroke—Bridging the gap between animals and humans. *Nat. Rev. Neurol.* *13*, 244–255.
- Desowska, A., and Turner, D.L. (2019). Dynamics of brain connectivity after stroke. *Rev. Neurosci.* *30*, 605–623.
- Bonkhoff, A.K., Hope, T., Bzdok, D., Guggisberg, A.G., Hawe, R.L., Dukelow, S.P., Rehme, A.K., Fink, G.R., Grefkes, C., and Bowman, H. (2020). Bringing proportional recovery into proportion: Bayesian modelling of post-stroke motor impairment. *Brain* *143*, 2189–2206.
- Stinear, C.M., Lang, C.E., Zeiler, S., and Byblow, W.D. (2020). Advances and challenges in stroke rehabilitation. *Lancet Neurol.* *19*, 348–360.
- Chamorro, Á., Lo, E.H., Renú, A., van Leyen, K., and Lyden, P.D. (2021). The future of neuroprotection in stroke. *J. Neurol. Neurosurg. Psychiatry* *92*, 129–135.
- Tovar-y-Romo, L.B., Penagos-Puig, A., and Ramírez-Jarquín, J.O. (2016). Endogenous recovery after brain damage: Molecular mechanisms that balance neuronal life/death fate. *J. Neurochem.* *136*, 13–27.
- Yu, T.-S., Washington, P.M., and Kernie, S.G. (2016). Injury-induced neurogenesis: Mechanisms and relevance. *Neuroscientist* *22*, 61–71.
- Ding, G., Jiang, Q., Li, L., Zhang, L., Zhang, Z.G., Ledbetter, K.A., Panda, S., Davarani, S.P.N., Athiraman, H., Li, Q., et al. (2008). Magnetic resonance imaging investigation of axonal remodeling and angiogenesis after embolic stroke in sildenafil-treated rats. *J. Cereb. Blood Flow Metab.* *28*, 1440–1448.
- Li, S., and Carmichael, S.T. (2006). Growth-associated gene and protein expression in the region of axonal sprouting in the aged brain after stroke. *Neurobiol. Dis.* *23*, 362–373.
- Carmichael, S.T., Kathirvelu, B., Schweppe, C.A., and Nie, E.H. (2017). Molecular, cellular and functional events in axonal sprouting after stroke. *Exp. Neurol.* *287*, 384–394.
- Li, S., Nie, E.H., Yin, Y., Benowitz, L.I., Tung, S., Vinters, H.V., Bahjat, F.R., Stenzel-Poore, M.P., Kawaguchi, R., Coppola, G., and Carmichael, S.T. (2015). GDF10 is a signal for axonal sprouting and functional recovery after stroke. *Nat. Neurosci.* *18*, 1737–1745.
- Clarkson, A.N., López-Valdés, H.E., Overman, J.J., Charles, A.C., Brennan, K.C., and Thomas Carmichael, S. (2013). Multimodal examination of structural and functional remapping in the mouse photothrombotic stroke model. *J. Cereb. Blood Flow Metab.* *33*, 716–723.
- Privat, A. (2003). Astrocytes as support for axonal regeneration in the central nervous system of mammals. *Glia* *43*, 91–93.
- Boghdadi, A.G., Spurrier, J., Teo, L., Li, M., Skarica, M., Cao, B., Kwan, W., Merson, T.D., Nilsson, S.K., Sestan, N., et al. (2020). Primate-specific response of astrocytes to stroke limits peripheral macrophage infiltration. *bioRxiv*. <https://doi.org/10.1101/2020.05.08.083501>.



20. Liddelow, S.A., and Sofroniew, M.V. (2019). Astrocytes usurp neurons as a disease focus. *Nat. Neurosci.* *22*, 512–513.
21. Güler, G., Gursoy-Ozdemir, Y., Erdemli, E., Can, A., and Dalkara, T. (2009). Astrocytes are more resistant to focal cerebral ischemia than neurons and die by a delayed necrosis. *Brain Pathol.* *19*, 630–641.
22. Almeida, A., Delgado-Esteban, M., Bolaños, J.P., and Medina, J.M. (2002). Oxygen and glucose deprivation induces mitochondrial dysfunction and oxidative stress in neurones but not in astrocytes in primary culture. *J. Neurochem.* *81*, 207–217.
23. Liu, Z., and Chopp, M. (2016). Astrocytes, therapeutic targets for neuroprotection and neurorestoration in ischemic stroke. *Prog. Neurobiol.* *144*, 103–120.
24. Nieland, L., Morsett, L.M., Broekman, M.L.D., Breakefield, X.O., and Abels, E.R. (2021). Extracellular vesicle-mediated bilateral communication between glioblastoma and astrocytes. *Trends Neurosci.* *44*, 215–226.
25. Li, L., Velumian, A.A., Samoilo, M., and Fehlings, M.G. (2016). A novel approach for studying the physiology and pathophysiology of myelinated and non-myelinated axons in the CNS white matter. *PLoS ONE* *11*, e0165637.
26. Fauré, J., Lachenal, G., Court, M., Hirrlinger, J., Chatellard-Cause, C., Blot, B., Grange, J., Schoehn, G., Goldberg, Y., Boyer, V., et al. (2006). Exosomes are released by cultured cortical neurones. *Mol. Cell. Neurosci.* *31*, 642–648.
27. You, Y., Borgmann, K., Edara, V.V., Stacy, S., Ghorpade, A., and Ikezu, T. (2019). Activated human astrocyte-derived extracellular vesicles modulate neuronal uptake, differentiation and firing. *J. Extracell. Vesicles* *9*, 1706801.
28. Dickens, A.M., Tovar-Y-Romo, L.B., Yoo, S.-W., Trout, A.L., Bae, M., Kanmogne, M., Megra, B., Williams, D.W., Witwer, K.W., Gacias, M., et al. (2017). Astrocyte-shed extracellular vesicles regulate the peripheral leukocyte response to inflammatory brain lesions. *Sci. Signal.* *10*, eaai7696.
29. Yu, G., Wang, L.-G., Han, Y., and He, Q.-Y. (2012). clusterProfiler: An R package for comparing biological themes among gene clusters. *OMICS* *16*, 284–287.
30. Romo, R., and Rossi-Pool, R. (2020). Turning touch into perception. *Neuron* *105*, 16–33.
31. Bauer, A.Q., Kraft, A.W., Wright, P.W., Snyder, A.Z., Lee, J.-M., and Culver, J.P. (2014). Optical imaging of disrupted functional connectivity following ischemic stroke in mice. *Neuroimage* *99*, 388–401.
32. van der Zijden, J.P., Wu, O., van der Toorn, A., Roeling, T.P., Bleys, R.L.A.W., and Dijkhuizen, R.M. (2007). Changes in neuronal connectivity after stroke in rats as studied by serial manganese-enhanced MRI. *Neuroimage* *34*, 1650–1657.
33. Regenhardt, R.W., Takase, H., Lo, E.H., and Lin, D.J. (2020). Translating concepts of neural repair after stroke: Structural and functional targets for recovery. *Restor. Neurol. Neurosci.* *38*, 67–92.
34. Joy, M.T., and Carmichael, S.T. (2021). Encouraging an excitable brain state: Mechanisms of brain repair in stroke. *Nat. Rev. Neurosci.* *22*, 38–53.
35. Deng, B., Li, L., Gou, X., Xu, H., Zhao, Z., Wang, Q., and Xu, L. (2018). TAT-PEP enhanced neurobehavioral functional recovery by facilitating axonal regeneration and corticospinal tract projection after stroke. *Mol. Neurobiol.* *55*, 652–667.
36. Sinke, M.R., Otte, W.M., van Meer, M.P., van der Toorn, A., and Dijkhuizen, R.M. (2018). Modified structural network backbone in the contralesional hemisphere chronically after stroke in rat brain. *J. Cereb. Blood Flow Metab.* *38*, 1642–1653.
37. Hur, E.-M., Sajjilafu, and Zhou, F.Q. (2012). Growing the growth cone: Remodeling the cytoskeleton to promote axon regeneration. *Trends Neurosci.* *35*, 164–174.
38. Gharbawie, O.A., Karl, J.M., and Whishaw, I.Q. (2007). Recovery of skilled reaching following motor cortex stroke: Do residual corticofugal fibers mediate compensatory recovery? *Eur. J. Neurosci.* *26*, 3309–3327.
39. Rehme, A.K., Fink, G.R., von Cramon, D.Y., and Grefkes, C. (2011). The role of the contralesional motor cortex for motor recovery in the early days after stroke assessed with longitudinal fMRI. *Cereb. Cortex* *21*, 756–768.
40. Corbett, D., Carmichael, S.T., Murphy, T.H., Jones, T.A., Schwab, M.E., Jolkkonen, J., Clarkson, A.N., Dancuse, N., Weiloch, T., Johansen-Berg, H., et al. (2017). Enhancing the alignment of the preclinical and clinical stroke recovery research pipeline: Consensus-based core recommendations from the Stroke Recovery and Rehabilitation Roundtable translational working group. *Neurorehabil. Neural Repair* *31*, 699–707.
41. Bradke, F., Fawcett, J.W., and Spira, M.E. (2012). Assembly of a new growth cone after axotomy: The precursor to axon regeneration. *Nat. Rev. Neurosci.* *13*, 183–193.
42. Robinson, R.A., Griffiths, S.C., van de Haar, L.L., Malinauskas, T., van Battum, E.Y., Zelina, P., Schwab, R.A., Karia, D., Malinauskaitė, L., Brignani, S., et al. (2021). Simultaneous binding of guidance cues NET1 and RGM blocks extracellular NEO1 signaling. *Cell* *184*, 2103–2120.e31.
43. Nichol, R.H., IV, Hagen, K.M., Lombard, D.C., Dent, E.W., and Gómez, T.M. (2016). Guidance of axons by local coupling of retrograde flow to point contact adhesions. *J. Neurosci.* *36*, 2267–2282.
44. Li, S., Overman, J.J., Katsman, D., Kozlov, S.V., Donnelly, C.J., Twiss, J.L., Giger, R.J., Coppola, G., Geschwind, D.H., and Carmichael, S.T. (2010). An age-related sprouting transcriptome provides molecular control of axonal sprouting after stroke. *Nat. Neurosci.* *13*, 1496–1504.
45. Zamanian, J.L., Xu, L., Foo, L.C., Nouri, N., Zhou, L., Giffard, R.G., and Barres, B.A. (2012). Genomic analysis of reactive astrogliosis. *J. Neurosci.* *32*, 6391–6410.
46. Hira, K., Ueno, Y., Tanaka, R., Miyamoto, N., Yamashiro, K., Inaba, T., Urabe, T., Okano, H., and Hattori, N. (2018). Astrocyte-derived exosomes treated with a semaphorin 3A inhibitor enhance stroke recovery via prostaglandin D<sub>2</sub> synthase. *Stroke* *49*, 2483–2494.
47. Sfera, A., Petrini, S., Bellacchio, E., Nicita, F., Scibelli, F., Dentici, M.L., Alfieri, P., Cestra, G., Bertini, E.S., and Zanni, G. (2020). TUBB variants underlying different phenotypes result in altered vesicle trafficking and microtubule dynamics. *Int. J. Mol. Sci.* *21*, 1385.
48. Wang, Y.-Y., Wu, H.-I., Hsu, W.-L., Chung, H.-W., Yang, P.-H., Chang, Y.-C., and Chow, W.-Y. (2014). In vitro growth conditions and development affect differential distributions of RNA in axonal growth cones and shafts of cultured rat hippocampal neurons. *Mol. Cell. Neurosci.* *61*, 141–151.
49. Dupraz, S., Hilton, B.J., Husch, A., Santos, T.E., Coles, C.H., Stern, S., Brakebusch, C., and Bradke, F. (2019). RhoA controls axon extension independent of specification in the developing brain. *Curr. Biol.* *29*, 3874–3886.e9.
50. Hu, J., and Selzer, M.E. (2017). RhoA as a target to promote neuronal survival and axon regeneration. *Neural Regen. Res.* *12*, 525–528.
51. Klinger, M., Diekmann, H., Heinz, D., Hirsch, C., Hannbeck von Hanwehr, S., Petrusch, B., Oertle, T., Schwab, M.E., and Stuermer, C.A.O. (2004). Identification of two *nogo/rtn4* genes and analysis of Nogo-A expression in *Xenopus laevis*. *Mol. Cell. Neurosci.* *25*, 205–216.
52. Govek, E.-E., Wu, Z., Acehan, D., Molina, H., Rivera, K., Zhu, X., Fang, Y., Tessier-Lavigne, M., and Hatten, M.E. (2018). Cdc42 regulates neuronal polarity during cerebellar axon formation and glial-guided migration. *iScience* *1*, 35–48.
53. Matsuura, R., Tanaka, H., and Go, M.J. (2004). Distinct functions of Rac1 and Cdc42 during axon guidance and growth cone morphogenesis in *Drosophila*. *Eur. J. Neurosci.* *19*, 21–31.
54. Castellanos-Montiel, M.J., Chaineau, M., and Durcan, T.M. (2020). The neglected genes of ALS: Cytoskeletal dynamics impact synaptic degeneration in ALS. *Front. Cell. Neurosci.* *14*, 594975.
55. López-Murcia, F.J., Terni, B., and Llobet, A. (2015). SPARC triggers a cell-autonomous program of synapse elimination. *Proc. Natl. Acad. Sci. USA* *112*, 13366–13371.
56. Furusawa, K., Asada, A., Urrutia, P., Gonzalez-Billault, C., Fukuda, M., and Hisanaga, S.-I. (2017). Cdk5 regulation of the GRAB-mediated Rab8-Rab11 cascade in axon outgrowth. *J. Neurosci.* *37*, 790–806.
57. Van Battum, E.Y., Brignani, S., and Pasterkamp, R.J. (2015). Axon guidance proteins in neurological disorders. *Lancet Neurol.* *14*, 532–546.
58. Overman, J.J., Clarkson, A.N., Wanner, I.B., Overman, W.T., Eckstein, I., Maguire, J.L., Dinov, I.D., Toga, A.W., and Carmichael, S.T. (2012). A role for ephrin-A5 in axonal sprouting, recovery, and activity-dependent plasticity after stroke. *Proc. Natl. Acad. Sci. USA* *109*, E2230–E2239.
59. Gleichman, A.J., and Carmichael, S.T. (2014). Astrocytic therapies for neuronal repair in stroke. *Neurosci. Lett.* *565*, 47–52.
60. Li, C., Zhang, Y., Levin, A.M., Fan, B.Y., Teng, H., Ghannam, M.M., Chopp, M., and Zhang, Z.G. (2019). Distal axonal proteins and their related miRNAs in cultured cortical neurons. *Mol. Neurobiol.* *56*, 2703–2713.

61. Wang, T., Li, B., Yuan, X., Cui, L., Wang, Z., Zhang, Y., Yu, M., Xiu, Y., Zhang, Z., Li, W., et al. (2019). miR-20a plays a key regulatory role in the repair of spinal cord dorsal column lesion via PDZ-RhoGEF/RhoA/GAP43 axis in rat. *Cell. Mol. Neurobiol.* 39, 87–98.
62. Glaesel, K., May, C., Marcus, K., Matschke, V., Theiss, C., and Theis, V. (2020). miR-129-5p and miR-130a-3p regulate VEGFR-2 expression in sensory and motor neurons during development. *Int. J. Mol. Sci.* 21, 3839.
63. Cárdenas-Rivera, A., Campero-Romero, A.N., Heras-Romero, Y., Penagos-Puig, A., Rincón-Heredia, R., and Tovar-Y-Romo, L.B. (2019). Early post-stroke activation of vascular endothelial growth factor receptor 2 hinders the receptor 1-dependent neuroprotection afforded by the endogenous ligand. *Front. Cell. Neurosci.* 13, 270.
64. Tovar-Y-Romo, L.B., Ramírez-Jarquín, U.N., Lazo-Gómez, R., and Tapia, R. (2014). Trophic factors as modulators of motor neuron physiology and survival: Implications for ALS therapy. *Front. Cell. Neurosci.* 8, 61.
65. Iadecola, C. (2013). The pathobiology of vascular dementia. *Neuron* 80, 844–866.
66. Guo, M., Ma, X., Feng, Y., Han, S., Dong, Q., Cui, M., and Zhao, Y. (2019). In chronic hypoxia, glucose availability and hypoxic severity dictate the balance between HIF-1 and HIF-2 in astrocytes. *FASEB J.* 33, 11123–11136.
67. Hirayama, Y., and Koizumi, S. (2017). Hypoxia-independent mechanisms of HIF-1 $\alpha$  expression in astrocytes after ischemic preconditioning. *Glia* 65, 523–530.
68. Narayanan, S.V., Dave, K.R., and Perez-Pinzon, M.A. (2018). Ischemic preconditioning protects astrocytes against oxygen glucose deprivation via the nuclear erythroid 2-related factor 2 pathway. *Transl. Stroke Res.* 9, 99–109.
69. Coimbra-Costa, D., Garzón, F., Alva, N., Pinto, T.C.C., Aguado, F., Torrella, J.R., Carbonell, T., and Rama, R. (2021). Intermittent hypobaric hypoxic preconditioning provides neuroprotection by increasing antioxidant activity, erythropoietin expression and preventing apoptosis and astrogliosis in the brain of adult rats exposed to acute severe hypoxia. *Int. J. Mol. Sci.* 22, 5272.
70. Ijichi, A., Sakuma, S., and Tofilon, P.J. (1995). Hypoxia-induced vascular endothelial growth factor expression in normal rat astrocyte cultures. *Glia* 14, 87–93.
71. Chu, P.W.Y., Beart, P.M., and Jones, N.M. (2010). Preconditioning protects against oxidative injury involving hypoxia-inducible factor-1 and vascular endothelial growth factor in cultured astrocytes. *Eur. J. Pharmacol.* 633, 24–32.
72. Mimura, J., Kosaka, K., Maruyama, A., Satoh, T., Harada, N., Yoshida, H., Satoh, K., Yamamoto, M., and Itoh, K. (2011). Nrf2 regulates NGF mRNA induction by carnosic acid in T98G glioblastoma cells and normal human astrocytes. *J. Biochem.* 150, 209–217.
73. Koyama, Y., Baba, A., and Matsuda, T. (2005). Endothelins stimulate the expression of neurotrophin-3 in rat brain and rat cultured astrocytes. *Neuroscience* 136, 425–433.
74. Lin, C.-H., Cheng, F.-C., Lu, Y.-Z., Chu, L.-F., Wang, C.-H., and Hsueh, C.-M. (2006). Protection of ischemic brain cells is dependent on astrocyte-derived growth factors and their receptors. *Exp. Neurol.* 201, 225–233.
75. Fornaro, M., Giovannelli, A., Foggetti, A., Muratori, L., Geuna, S., Novajra, G., and Perroteau, I. (2020). Role of neurotrophic factors in enhancing linear axonal growth of ganglionic sensory neurons *in vitro*. *Neural Regen. Res.* 15, 1732–1739.
76. Turney, S.G., Ahmed, M., Chandrasekar, I., Wysolmerski, R.B., Goeckeler, Z.M., Rioux, R.M., Whitesides, G.M., and Bridgman, P.C. (2016). Nerve growth factor stimulates axon outgrowth through negative regulation of growth cone actomyosin restraint of microtubule advance. *Mol. Biol. Cell* 27, 500–517.
77. Logan, A., Ahmed, Z., Baird, A., Gonzalez, A.M., and Berry, M. (2006). Neurotrophic factor synergy is required for neuronal survival and disinhibited axon regeneration after CNS injury. *Brain* 129, 490–502.
78. Bonsergent, E., Grisard, E., Buchrieser, J., Schwartz, O., Théry, C., and Lavieu, G. (2021). Quantitative characterization of extracellular vesicle uptake and content delivery within mammalian cells. *Nat. Commun.* 12, 1864.
79. Li, S., Hafeez, A., Noorulla, F., Geng, X., Shao, G., Ren, C., Lu, G., Zhao, H., Ding, Y., and Ji, X. (2017). Preconditioning in neuroprotection: From hypoxia to ischemia. *Prog. Neurobiol.* 157, 79–91.
80. Angelova, P.R., Kasymov, V., Christie, I., Sheikhbahei, S., Turovsky, E., Marina, N., Korsak, A., Zwicker, J., Teschemacher, A.G., Ackland, G.L., et al. (2015). Functional oxygen sensitivity of astrocytes. *J. Neurosci.* 35, 10460–10473.
81. Hirayama, Y., Anzai, N., and Koizumi, S. (2021). Mechanisms underlying sensitization of P2X7 receptors in astrocytes for induction of ischemic tolerance. *Glia* 69, 2100–2110.
82. Tovar-Y-Romo, L.B., Kolson, D.L., Bandaru, V.V.R., Drewes, J.L., Graham, D.R., and Haughey, N.J. (2013). Adenosine triphosphate released from HIV-infected macrophages regulates glutamatergic tone and dendritic spine density on neurons. *J. Neuroimmune Pharmacol.* 8, 998–1009.
83. Guitart, K., Loers, G., Buck, F., Bork, U., Schachner, M., and Kleene, R. (2016). Improvement of neuronal cell survival by astrocyte-derived exosomes under hypoxic and ischemic conditions depends on prion protein. *Glia* 64, 896–910.
84. Bondarenko, A., Svichar, N., and Chesler, M. (2005). Role of Na<sup>+</sup>-H<sup>+</sup> and Na<sup>+</sup>-Ca<sup>2+</sup> exchange in hypoxia-related acute astrocyte death. *Glia* 49, 143–152.
85. Park, S.J., Kim, J.M., Kim, J., Hur, J., Park, S., Kim, K., Shin, H.-J., and Chwae, Y.-J. (2018). Molecular mechanisms of biogenesis of apoptotic exosome-like vesicles and their roles as damage-associated molecular patterns. *Proc. Natl. Acad. Sci. USA* 115, E11721–E11730.
86. Kakarla, R., Hur, J., Kim, Y.J., Kim, J., and Chwae, Y.-J. (2020). Apoptotic cell-derived exosomes: Messages from dying cells. *Exp. Mol. Med.* 52, 1–6.
87. Yaghoubi, S., Najminejad, H., Dabaghian, M., Karimi, M.H., Abdollahpour-Alitappeh, M., Rad, F., Mahi-Birjand, M., Mohammadi, S., Mohseni, F., Sobhani Lari, M., et al. (2020). How hypoxia regulate exosomes in ischemic diseases and cancer microenvironment? *IUBMB Life* 72, 1286–1305.
88. Liu, R., Wang, Z., Gou, L., and Xu, H. (2015). A cortical astrocyte subpopulation inhibits axon growth *in vitro* and *in vivo*. *Mol. Med. Rep.* 12, 2598–2606.
89. Rigby, M.J., Gomez, T.M., and Puglielli, L. (2020). Glial cell-axonal growth cone interactions in neurodevelopment and regeneration. *Front. Neurosci.* 14, 203.
90. Li, Z., Moniruzzaman, M., Dastgheyb, R.M., Yoo, S.-W., Wang, M., Hao, H., Liu, J., Casaccia, P., Noguera-Ortiz, C., Kapogiannis, D., et al. (2020). Astrocytes deliver CK1 to neurons via extracellular vesicles in response to inflammation promoting the translation and amyloidogenic processing of APP. *J. Extracell. Vesicles* 10, e12035.
91. Goetzl, E.J., Yaffe, K., Peltz, C.B., Ledreux, A., Gorgens, K., Davidson, B., Granholm, A.-C., Mustapic, M., Kapogiannis, D., Tweedie, D., and Greig, N.H. (2020). Traumatic brain injury increases plasma astrocyte-derived exosome levels of neurotoxic complement proteins. *FASEB J.* 34, 3359–3366.
92. Percie du Sert, N., Hurst, V., Ahluwalia, A., Alam, S., Avey, M.T., Baker, M., Browne, W.J., Clark, A., Cuthill, I.C., Dirnagl, U., et al. (2020). The ARRIVE guidelines 2.0: Updated guidelines for reporting animal research. *PLoS Biol.* 18, e3000410.
93. Suzuki, S., Brown, C.M., and Wise, P.M. (2009). Neuroprotective effects of estrogens following ischemic stroke. *Front. Neuroendocrinol.* 30, 201–211.
94. Yeh, F.-C., Verstynen, T.D., Wang, Y., Fernández-Miranda, J.C., and Tseng, W.-Y.I. (2013). Deterministic diffusion fiber tracking improved by quantitative anisotropy. *PLoS ONE* 8, e80713.
95. Lauer, S.M., Schneeweiß, U., Brecht, M., and Ray, S. (2018). Visualization of cortical modules in flattened mammalian cortices. *J. Vis. Exp.* (131).
96. van der Walt, S., Schönberger, J.L., Nunez-Iglesias, J., Boulogne, F., Warner, J.D., Yager, N., Gouillart, E., and Yu, T.; scikit-image contributors (2014). scikit-image: Image processing in Python. *PeerJ* 2, e453.

## **Supplemental Information**

### **Improved post-stroke spontaneous recovery**

#### **by astrocytic extracellular vesicles**

**Yessica Heras-Romero, Axayacatl Morales-Guadarrama, Ricardo Santana-Martínez, Isaac Ponce, Ruth Rincón-Heredia, Augusto César Poot-Hernández, Araceli Martínez-Moreno, Esteban Urrieta, Berenice N. Bernal-Vicente, Aura N. Campero-Romero, Perla Moreno-Castilla, Nigel H. Greig, Martha L. Escobar, Luis Concha, and Luis B. Tovar-y-Romo**

## Supplementary Figure 1

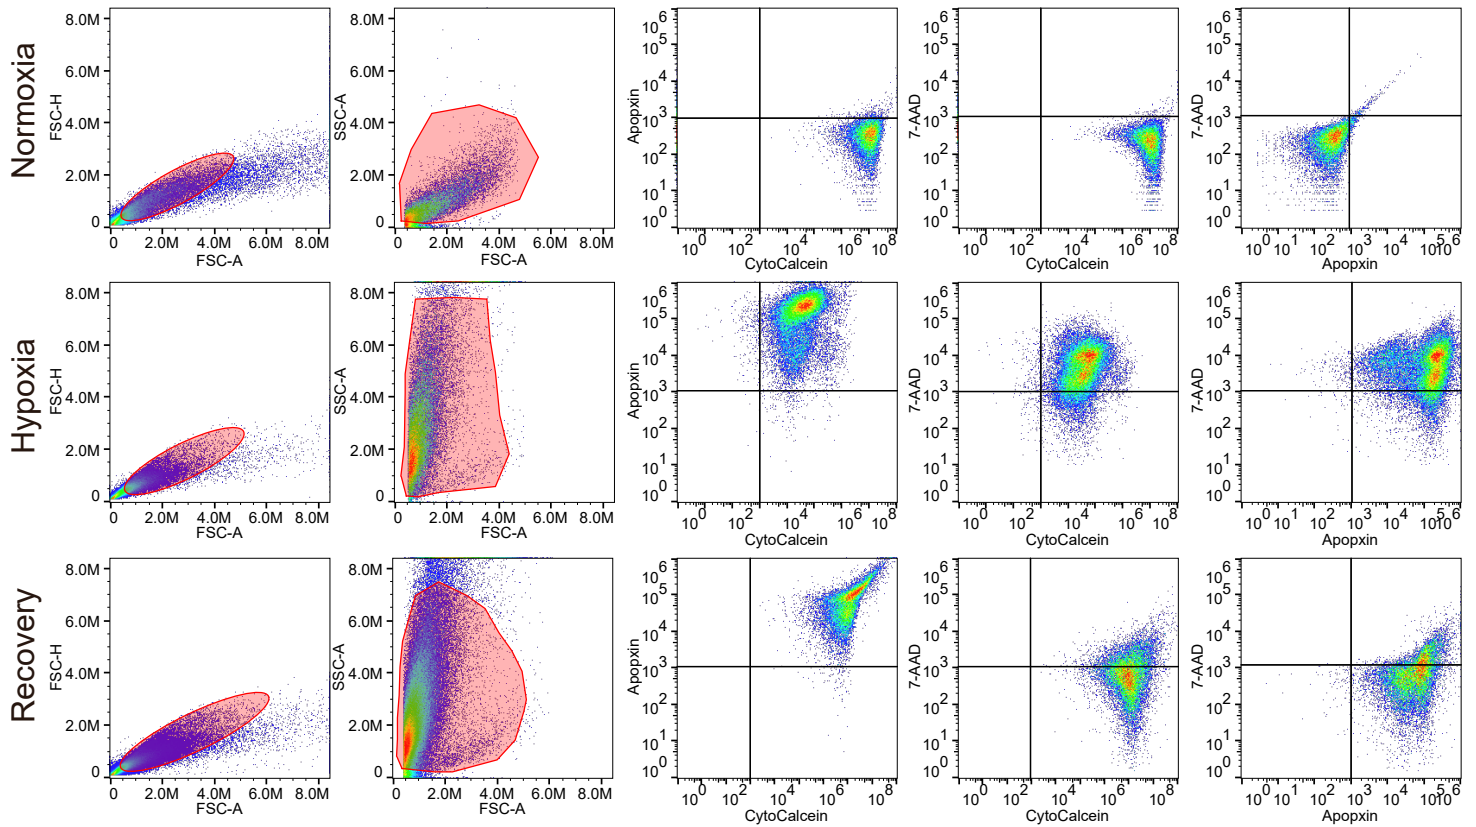

**Supplementary Figure 1.** Representative scattergrams showing flow cytometry for cell viability after hypoxia. Gating for singlets (FSC-A/FSC-H) and granularity (FSC-A/SSC-A) are shown on the left. Analysis of CytoCalcein, Apoptin, and 7-AAD markers in astrocytes cultured under normoxia, hypoxia (6 h), and recovery (6 h hypoxia followed by 42 h normoxia) conditions are shown on the right. The dot plots of Apoptin vs. CytoCalcein, 7-AAD vs. CytoCalcein, and 7-AAD vs. Apoptin show resolution of live, injured, and dead cell populations.

## Supplementary Figure 2

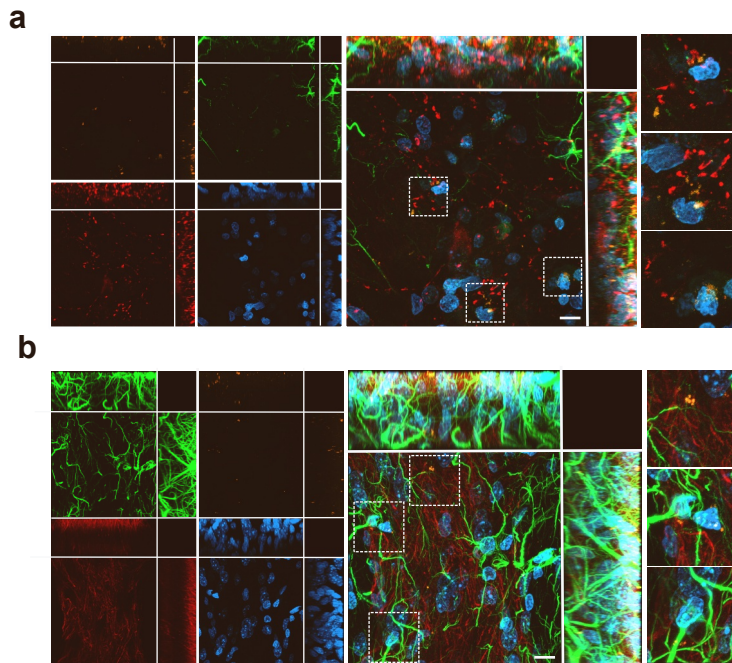

**Supplementary figure 2** Distribution of EVs stained with PKH26 (orange) at 24 h after i.c.v. injection in the brain of stroke-challenged rats in the striatum **(a)** and motor cortex **(b)**. EVs internalize in neurons (MAP2; red) and astrocytes (GFAP; green) and preferentially localized to perinuclear (DAPI; blue) regions. Dotted squares demark regions where EVs localize. Images are maximum projections of a Z-stack of 20 optical slices showing the orthogonal planes, and nuclei are stained with DAPI (blue), scale bar equals 10  $\mu\text{m}$ .

### Supplementary Figure 3

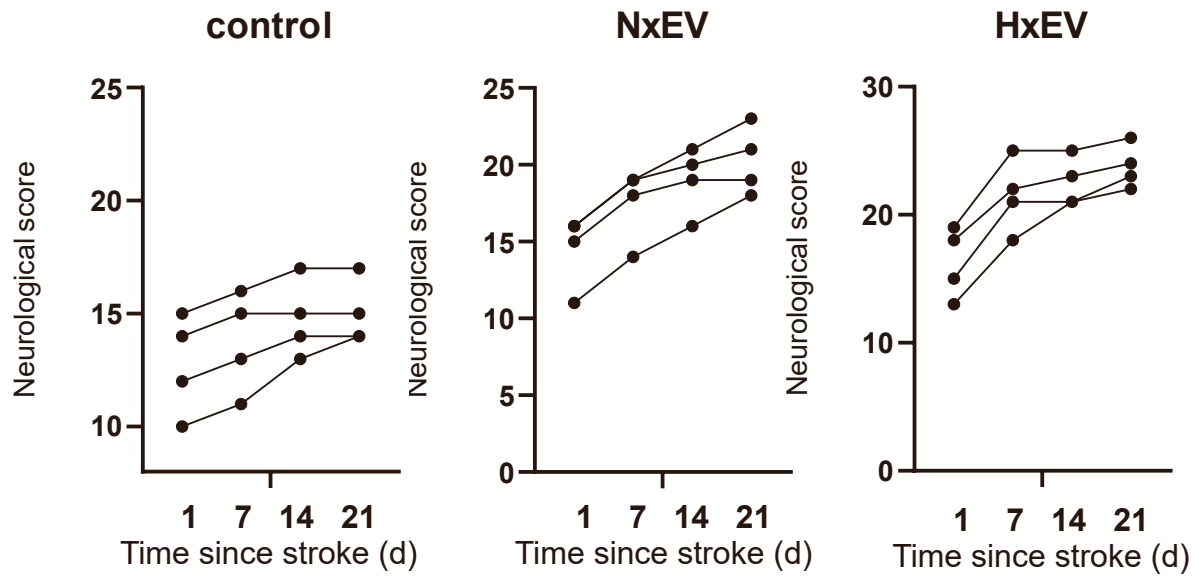

**Supplementary figure 3.** Spontaneous recovery trends of individual animals in each group, assessed at 1, 7, 14, and 21 days post-stroke.

Supplementary Figure 4

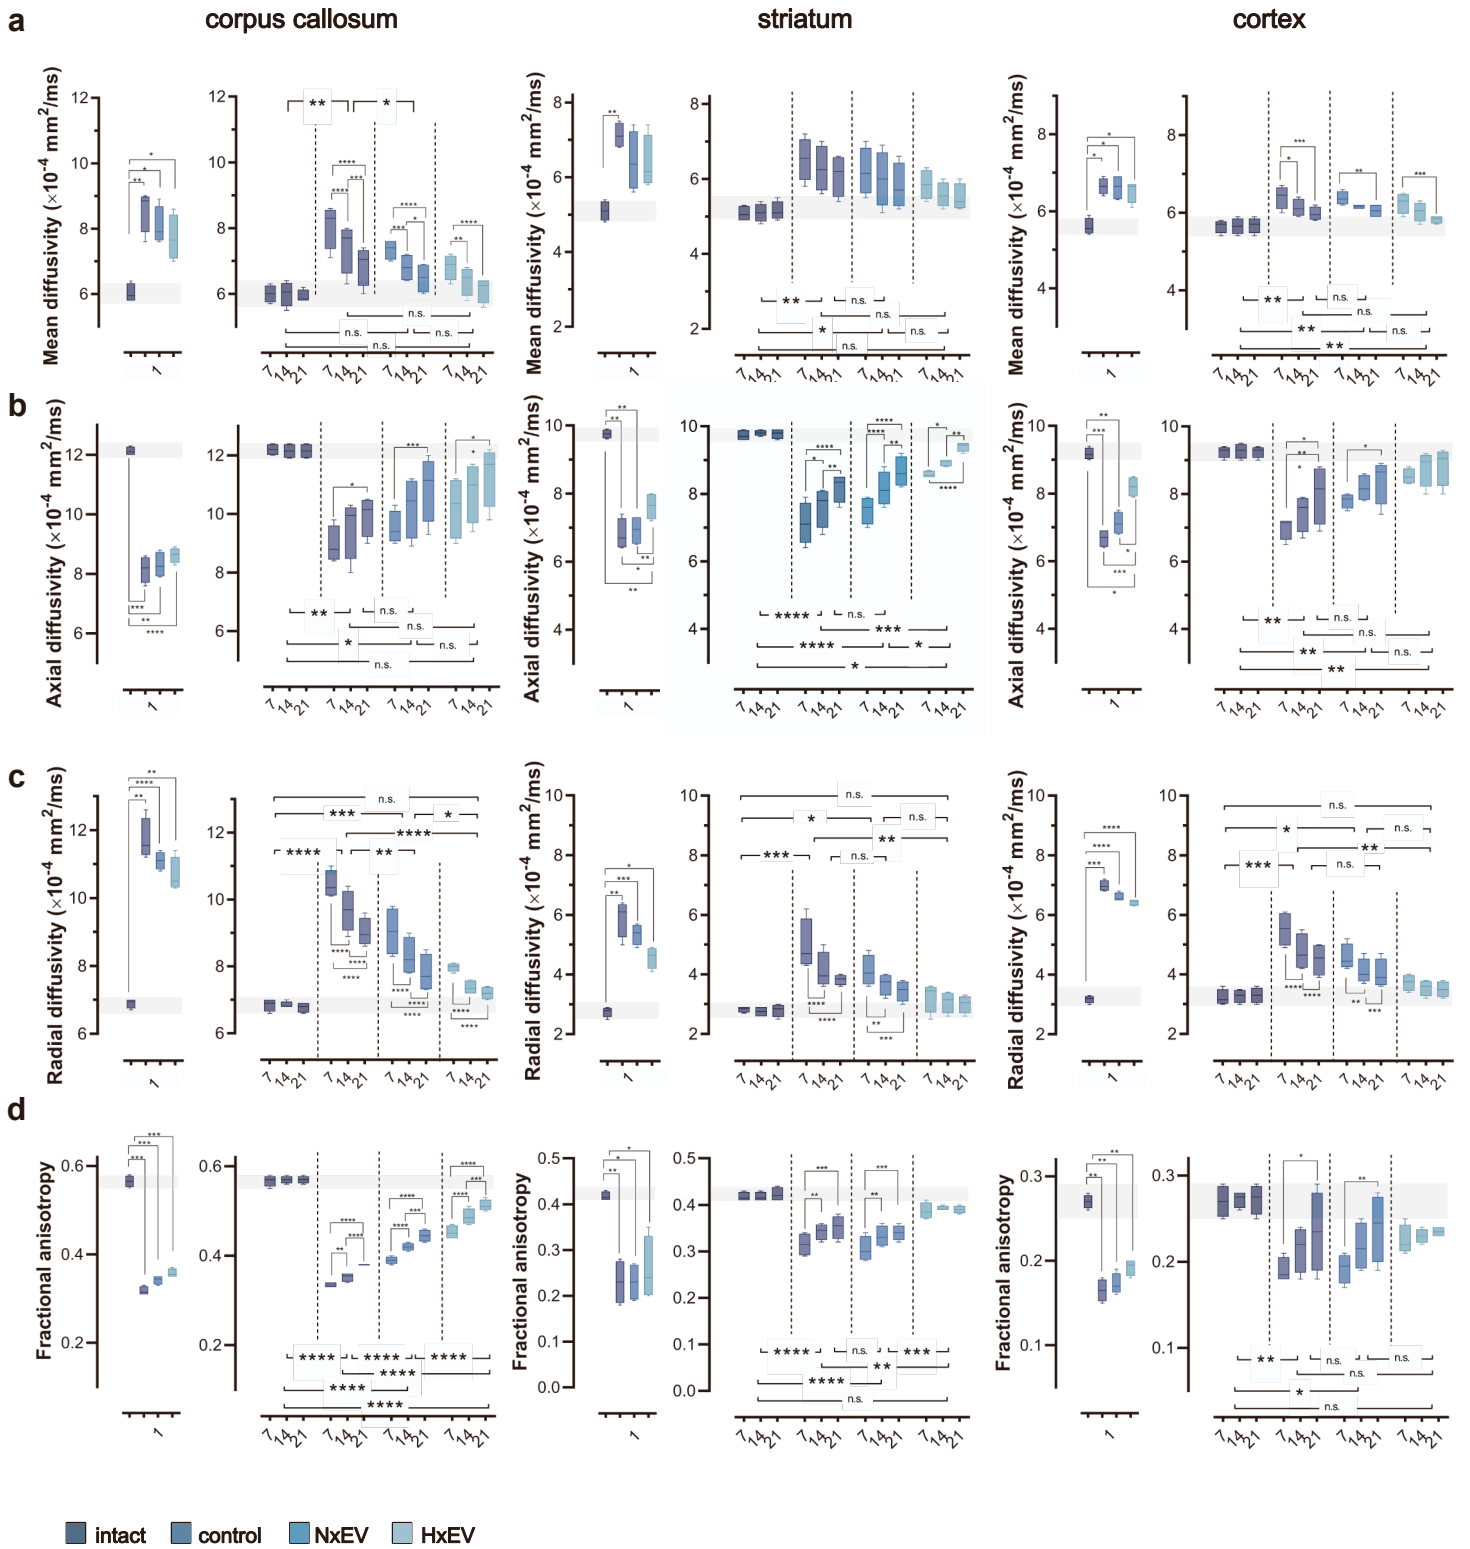

**Supplementary figure 4.** Evolution of DTI parameters in the contra-lesional hemisphere. **(a)** mean diffusivity, **(b)** axial diffusivity, **(c)** radial diffusivity, and **(d)** fractional anisotropy were determined from diffusion tensor imaging (DTI) of the contralateral corpus callosum (left column), striatum (middle column), and motor cortex (right column) at 1, 7, 14 and 21 days post-stroke. Boxplots on day 1 show the alterations caused by the stroke in all four DTI parameters; no statistical differences exist between stroke-challenged animals treated with vehicle (control) and those that received EVs 30 min after the initiation of reperfusion. Boxplots show the min and max values within each group, the dispersion span from Q1 to Q3, and the mean, n=4. The shaded horizontal bar in each plot marks the span of  $\pm 1$  S.D. of the intact group baseline values. Statistical differences of the recovery trend are indicated among groups with repeated measures two-way ANOVA followed by Tukey's post hoc, and changes over time within each group are also indicated with two-way ANOVA followed by Tukey's post hoc. \*  $p < 0.05$ , \*\* $p < 0.01$ , \*\*\* $p < 0.001$  and \*\*\*\* $p < 0.0001$ .



## Supplementary Figure 5

**a**

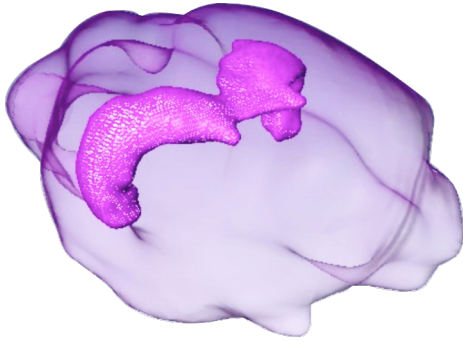

**b**

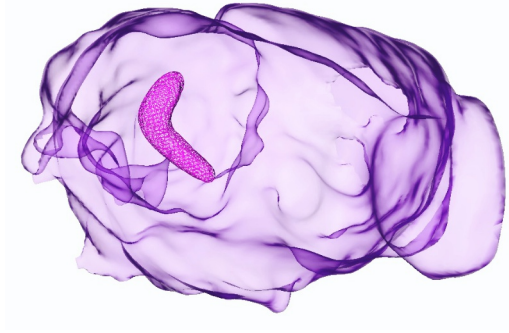

**c**

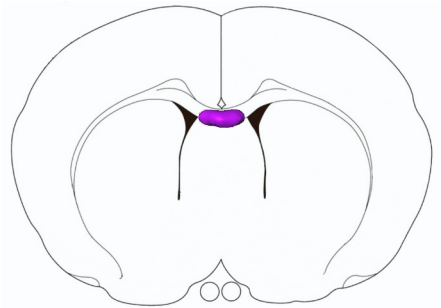

**d**

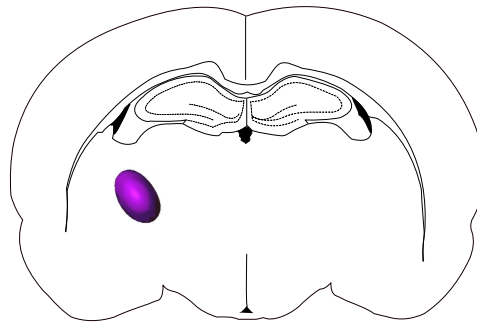

**Supplementary figure 5.** Diffusion tensor imaging-based tissue segmentation rendering of the corpus callosum **(a)** and the corticostriatal tract **(b)** of the rat brain. Regions of interest where seeds used to initiate tractography were placed in the corpus callosum (AP 0.2 from Bregma) **(c)** and corticostriatal (AP -2.8 from Bregma) **(d)** tracts.

## Supplementary Figure 6

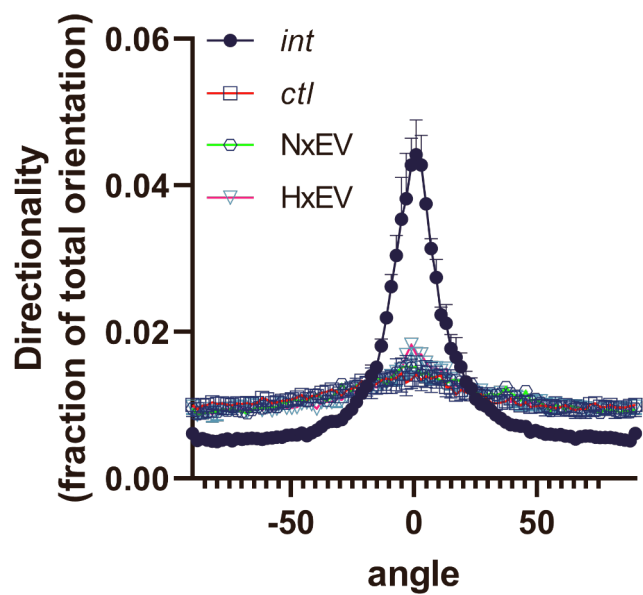

**Supplementary figure 6.** Analysis of the directionality of MAP-2 immunolabeled fibers in the striatum 21 days after stroke. The EV-induced increases in fiber staining did not restore the directionality of the fibers after stroke.

## Supplementary Figure 7

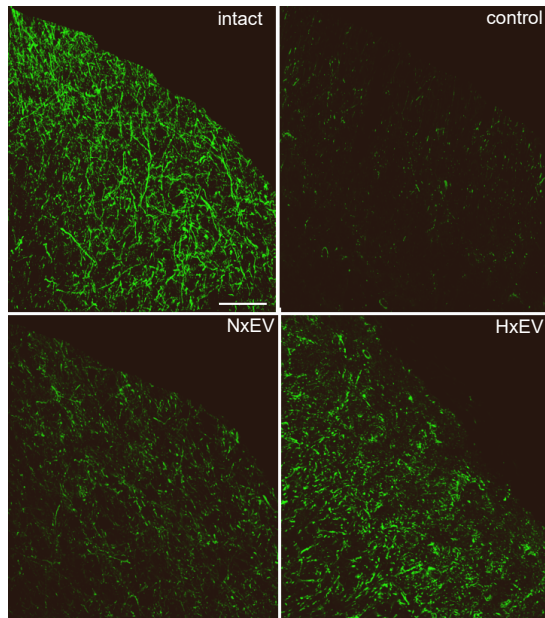

**Supplementary figure 7.** Representative confocal micrographs of cortical labeling in animals injected in the dorsal striatum with the cholera toxin subunit B, which is retrogradely transported through the axonal system. Injections were made on day 14 after stroke and followed the fluorescent label's localization in the innervated cortical regions at day 21 post-stroke. Scale bar equals 50  $\mu\text{m}$ .

## Supplementary Figure 8

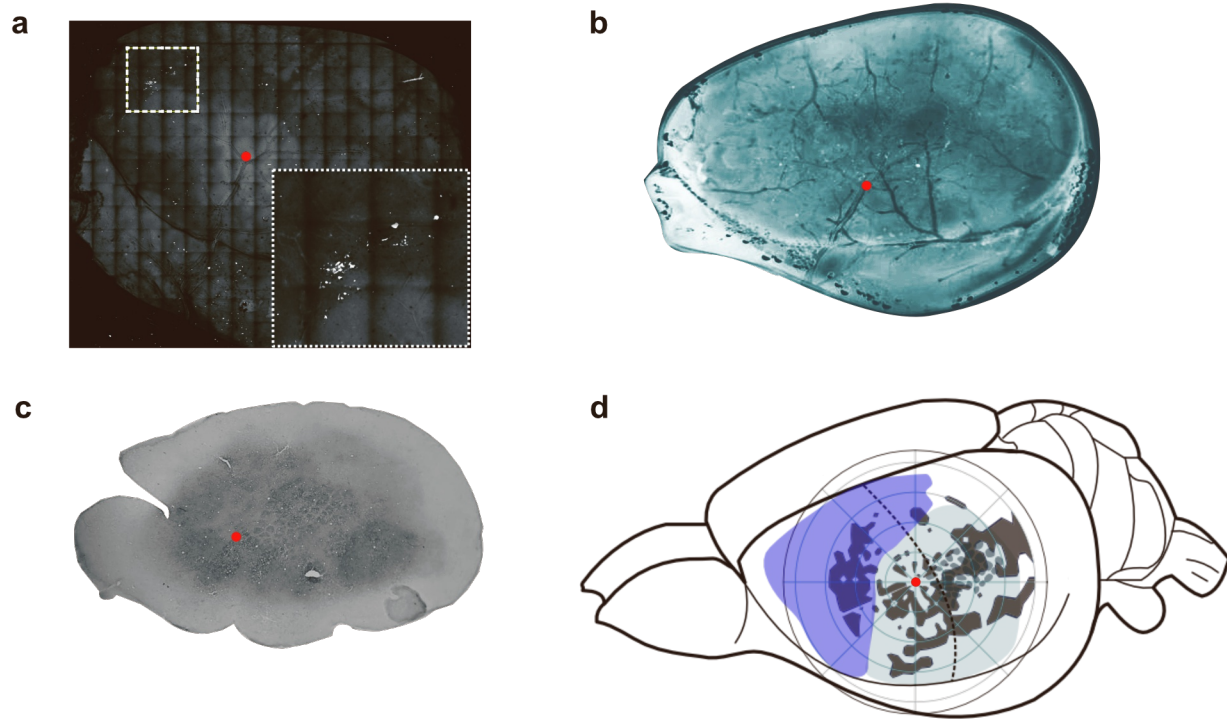

**Supplementary figure 8.** Mapping of the cortical axonal projections from the dorsal striatum was made by superposing the panoramic two-photon image (**a**) where the vasculature can be clearly appreciated, with the ink-stained flattened cortex showing the superficial cortical vasculature (**b**) and the cytochrome c oxidase staining of the barrel cortex (**c**). The red dot indicates the exact anatomical localization at the first branch split of the M4 segment in the MCA's superior trunk and its relative position to the barrel cortex. This anatomical location was designated as the origin (0,0 coordinate) for polar plots (**d**).

**Supplementary video 1. Extracellular vesicles in the contralateral striatum 24 h after i.c.v. injection.** The animation shows a confocal reconstruction of maximum projections of a Z-stack of 20 optical slices in a striatal tissue section from a rat injected i.c.v. with EVs stained with PKH26 (orange). Neurons are identified by MAP2 staining in red, and astrocytes are labeled with GFAP in green. Cell nuclei are stained with DAPI in blue. Blue circles indicate the presence of external EVs near the nuclei of neurons and astrocytes.

**Supplementary video 2. Sensory test: stimulation of vibrissae 14 days after stroke.** Two rats administered with vehicle (control) or HxEV are stimulated by a gentle stroke of the vibrissae 14 days after MCAO. The rat on the right that received HxEV is more responsive to the stimulation than the control one.

**Supplementary video 3. Infarct volume and tractography 21 days after stroke.** A representative MRI reconstruction of the infarct lesion for each experimental condition is presented 21 days after stroke. The animals treated with NxEV or HxEV exhibit a decreased lesion volume. Representative tractographies generated from DTI imaging for each experimental condition show an enhanced axonal recovery in animals that received HxEV and NxEV compared with the control animal injected with vehicle only.
